# A small dynamic leaf-level model predicting photosynthesis in greenhouse tomatoes

D Joubert <sup>1</sup> \*, N Zhang <sup>2</sup>  ‡, S.R. Berman <sup>2</sup>  ‡, E Kaiser <sup>2</sup>  ‡, J Molenaar <sup>1</sup>  ‡, J.D. Stigter <sup>1</sup>  ‡

**1** Mathematical and Statistical Methods Group, Wageningen University and Research, Wageningen, The Netherlands

**2** Horticulture and Product Physiology, Wageningen University and Research, Wageningen, The Netherlands

 These authors contributed equally to this work.

 These authors also contributed equally to this work.

 Current Address: Mathematical and Statistical Methods Group, Wageningen University and Research, P.O. Box 16, Wageningen, 6700AV, The Netherlands

\* dominique.joubert@wur.nl

## Abstract

The conversion of supplemental greenhouse light energy into biomass is not always optimal. Recent trends in global energy prices and discussions on climate change highlight the need to reduce our energy footprint associated with the use of supplemental light in greenhouse crop production. This can be achieved by implementing “smart” lighting regimens which in turn rely on a good understanding of how fluctuating light influences photosynthetic physiology.

Here, a simple fit-for-purpose dynamic model is presented. It accurately predicts net leaf photosynthesis under natural fluctuating light. It comprises two ordinary differential equations predicting: 1) the total stomatal conductance to CO<sub>2</sub> diffusion and 2) the CO<sub>2</sub> concentration inside a leaf. It contains elements of the Farquhar-von Caemmerer-Berry model and the successful incorporation of this model suggests that for tomato (*Solanum lycopersicum* L.), it is sufficient to assume that Rubisco remains activated despite rapid fluctuations in irradiance. Furthermore, predictions of the net photosynthetic rate under both 400ppm and enriched 800ppm ambient CO<sub>2</sub> concentrations indicate a strong correlation between the dynamic rate of photosynthesis and the rate of electron transport. Finally, we are able to indicate whether dynamic photosynthesis is Rubisco or electron transport rate limited.

## Author summary

The cultivation of greenhouse crops under optimised conditions will become increasingly important, with supplemental lighting playing a vital role. However, converting light energy into plant photosynthesis is not always optimal. A potential venue that may lead to the efficient conversion of light energy involves a model-based implementation of “smart” lighting control strategy. This approach does however necessitate a good understanding of how plants harness light energy under natural fluctuating irradiance. Accordingly, as a first step, we have developed a small leaf-level model that predicts dynamic photosynthesis in natural fluctuating light. It may potentially be used in future supplemental light control applications.

## Introduction

The cultivation of greenhouse crops under optimised conditions will become increasingly important, with the need for year-round crop harvesting under changing environmental conditions as a driving factor. The widespread use of supplemental lighting to optimise growing conditions is a key tool at our disposal. The efficiency of converting light energy into plant photosynthesis is however not always optimal. This is particularly true when lights are first turned on, where time is required for the activation of key photosynthetic enzymes and for adjustments in stomatal pore aperture [1].

Given recent trends in global energy prices and continuous discussions on climate change, our energy footprint associated with the use of supplemental light needs to be reduced. Two potential avenues that may lead to the efficient conversion of light energy into photosynthesis are: 1) the use of light-emitting diodes (LEDs) in supplemental lighting applications. LEDs increase the efficiency with which electrical energy is converted to photosynthetically active radiation (PAR), the radiation with wavelength 400-700nm, which powers photosynthesis [2]. 2) A model-based implementation of “smart” lighting regimens. This approach necessitates a good understanding of how plants harness light energy under natural fluctuating irradiance (I).

Plant responses to fluctuating irradiance occur across numerous levels of complexity, ranging from the whole canopy (at crop level and governed by plant structure) to the biochemistry of a single reaction (at leaf level and governed by physiology) and across different orders of magnitude in time. At the top of the canopy light levels depend on factors such as the solar angle and amount of cloud cover. Lower parts of a crop canopy rely on light in the form of sun-flecks, and the amount of these in turn depends on the canopy’s structure [3].

Light intensity is the most dynamic condition to which greenhouse crops need to respond and can change at time scales ranging from a season (winter versus summer) to less than 1 second (passing clouds) [4]. The variation of incident light on leaves in the upper canopy can have a substantial effect on photosynthesis in this upper layer since it accounts for up to 75% of crop canopy carbon assimilation [5].

At leaf level, a plant’s ability to regulate photosynthesis in response to rapid variations in irradiance may be restricted by the following factors: 1) *the opening/closing of stomata*, 2) *the activation/deactivation of Calvin cycle enzymes*, 3) *the up-regulation/down-regulation of photoprotective processes* [3], and 4) *transiently changing mesophyll conductance* [6].

Previous leaf-level models have ranged both in complexity and in time scales of prediction. These often include the well-known Farquhar-von Caemmerer-Berry (FvCB) model, which mathematically describes key Calvin cycle processes and linear transport rates [7]. The result is an estimated net photosynthetic rate ( $A_n$ ) which stems from competitive enzymatic processes involving  $\text{CO}_2$  and  $\text{O}_2$  binding under different environmental conditions [8]. A brief summary of selected *small* dynamic models is given in Table (1). We included a summary of the model presented here for comparison.

The rest of this article is organised as follows. In section 1 we provide the theoretical background to the model and describe the plant physiology underpinning the well-known FvCB model. We also discuss three of the factors that may restrict  $A_n$  in greater detail. The model is defined in section 2, and the materials and methods used are discussed in section 3. Results and discussion are presented in sections 4 and 5 respectively, and conclusions are given in section 6.

## Nomenclature

### Symbols

|            |                                                                                                                                             |
|------------|---------------------------------------------------------------------------------------------------------------------------------------------|
| $A_n$      | Net photosynthetic rate [ $\mu\text{molm}^{-2}\text{s}^{-1}$ ]                                                                              |
| $g_{tc}$   | Total stomatal conductance to $\text{CO}_2$ diffusion [ $\text{molm}^{-2}\text{s}^{-1}$ ]                                                   |
| $g_m$      | Mesophyll conductance [ $\text{molm}^{-2}\text{s}^{-1}$ ]                                                                                   |
| $c_i$      | $\text{CO}_2$ concentration inside a leaf [ $\mu\text{molm}^{-2}\text{s}^{-1}$ ]                                                            |
| $c_a$      | Ambient $\text{CO}_2$ concentration [ $\mu\text{molm}^{-2}\text{s}^{-1}$ ]                                                                  |
| $c_c$      | $\text{CO}_2$ concentration in the chloroplast stroma [ $\mu\text{molm}^{-2}\text{s}^{-1}$ ]                                                |
| $I$        | Irradiance [ $\mu\text{molm}^{-2}\text{s}^{-1}$ ]                                                                                           |
| $T_l$      | Leaf temperature [K]                                                                                                                        |
| $k_u$      | Time constant for increases in $g_{tc}$ [s]                                                                                                 |
| $k_d$      | Time constant for decreases in $g_{tc}$ [s]                                                                                                 |
| $R$        | Ideal gas constant [ $\text{m}^3\text{Pa}^1\text{mol}^{-1}\text{K}^{-1}$ ]                                                                  |
| $d$        | Leaf diameter [m]                                                                                                                           |
| $P_a$      | Atmospheric pressure [Pa]                                                                                                                   |
| $V_{cmax}$ | Maximum obtainable carboxylation rate [ $\mu\text{molm}^{-2}\text{s}^{-1}$ ]                                                                |
| $K_c$      | Michaelis-Menten constant for $\text{CO}_2$ [ $\mu\text{molm}^{-2}\text{s}^{-1}$ ]                                                          |
| $K_o$      | Michaelis-Menten constant for $\text{O}_2$ [kPa]                                                                                            |
| $O_i$      | Partial pressure of $\text{O}_2$ in air [kPa]                                                                                               |
| $\Gamma^*$ | The Rubisco compensation point [ $\mu\text{molm}^{-2}\text{s}^{-1}$ ]                                                                       |
| $J$        | Steady-state electron transport rate [ $\mu\text{molm}^{-2}\text{s}^{-1}$ ]                                                                 |
| $G$        | Steady-state total stomatal conductance to $\text{CO}_2$ diffusion [ $\text{molm}^{-2}\text{s}^{-1}$ ]                                      |
| $W_c$      | Rubisco limited carboxylation rate [ $\mu\text{molm}^{-2}\text{s}^{-1}$ ]                                                                   |
| $W_j$      | Electron transport rate limited carboxylation rate [ $\mu\text{molm}^{-2}\text{s}^{-1}$ ]                                                   |
| $R_d$      | Mitochondrial respiration which includes $\text{CO}_2$ release in light other than photo-respiration [ $\mu\text{molm}^{-2}\text{s}^{-1}$ ] |
| RH         | Relative humidity [%]                                                                                                                       |

## 1 Theory

We briefly introduce three of the factors that affect  $A_n$ , and which are included in the model: 1) stomatal conductance, 2) the Rubisco limited carboxylation rate, and 3) the electron transport limited carboxylation rate.

### 1.1 The opening and closing of stomata

Stomata are located on both the upper (u) and lower (l) surfaces of tomato leaves. They are tasked with regulating the flux of gaseous  $\text{H}_2\text{O}$  and  $\text{CO}_2$  between a leaf and its surroundings. They do so by adjusting their pore aperture and this is achieved by changing the form of their 2 guard cells. These structures can therefore be thought of as conductors of  $\text{CO}_2$  diffusion, and therefore only allow a certain amount of  $\text{CO}_2$  to enter a leaf.

Stomatal aperture depends on numerous environmental cues. For C3 plants (plants that allow for the direct carbon fixation of  $\text{CO}_2$ ) under non-limiting growth conditions, pore sizes increase with increased *irradiance* and low  $\text{CO}_2$  concentrations [12].

The metabolic regulation of these guard cells is highly complex and accordingly, an empirical model that predicts dynamic changes in the conductance of  $\text{CO}_2$  related to perturbations in irradiance is used here [11]. Refer to S1 Supporting Information for a discussion on how the total stomatal conductance to  $\text{CO}_2$  diffusion ( $g_{tc}$ ) is defined.

**Table 1. Summary of selected small dynamic leaf-level photosynthesis models.** (Ordinary differential equations abbreviated as ODEs).

| Year                             | ODEs                                       | Reported Timescale        | Summary                                                                                                                                                                                                                                                                                                                                                                                                                                                                                                    |
|----------------------------------|--------------------------------------------|---------------------------|------------------------------------------------------------------------------------------------------------------------------------------------------------------------------------------------------------------------------------------------------------------------------------------------------------------------------------------------------------------------------------------------------------------------------------------------------------------------------------------------------------|
| Pearcy<br>1997 [9]               | 8 total<br>(3 Stomata)<br>(5 Calvin cycle) | Seconds                   | Species: <i>Alocasia macrorrhiza</i> Soybean ( <i>Glycine max</i> )<br><ol style="list-style-type: none"> <li>1. Environmental disturbance considered: irradiance.</li> <li>2. Contains predictions for metabolite pool sizes and the activation and deactivation of Calvin cycle enzymes.</li> <li>3. Describes the <i>asymmetric</i> response of the stomata to either increasing or decreasing irradiance using 2 different time constants.</li> <li>4. High correlation between parameters.</li> </ol> |
| Noe<br>2003 [10]                 | 3 total<br>(1 Stomata)<br>(2 Calvin cycle) | Minutes                   | Species: Oak ( <i>Quercus robur L.</i> )<br><ol style="list-style-type: none"> <li>1. Environmental disturbances considered: irradiance, vapour pressure deficit, temperature.</li> <li>2. Amount of Calvin cycle intermediates, predicted by a third ODE, are regarded as inhibitors to the rate of CO<sub>2</sub> binding.</li> <li>3. Assumes <i>symmetric</i> response of the stomata to either increasing or decreasing irradiance.</li> </ol>                                                        |
| Vialet-<br>Chabrand<br>2016 [11] | 4 total<br>(1 Stomata)<br>(3 Calvin cycle) | Hours                     | Species: <i>Arabidopsis thaliana</i><br><ol style="list-style-type: none"> <li>1. Environmental disturbances considered: irradiance, temperature.</li> <li>2. CO<sub>2</sub> concentration at the site of carboxylation is modelled, thereby including mesophyll conductance.</li> <li>3. Photosynthetic efficiency that gradually decreases over the course of the day is used as negative feedback to the photosynthetic rate.</li> <li>4. Dynamic estimation of 7 parameters.</li> </ol>                |
| Our model                        | 2 total<br>(1 Stomata)<br>(1 Calvin cycle) | Simulated every 2 seconds | Species: <i>Tomato</i><br><ol style="list-style-type: none"> <li>1. Environmental disturbances considered: irradiance, temperature, ambient CO<sub>2</sub> concentration.</li> <li>2. Predicts which of the limiting factors of FvCB model are at play under natural fluctuating irradiance.</li> <li>3. Dynamic estimation of 3 parameters.</li> </ol>                                                                                                                                                    |

## 1.2 The FvCB model

This model describes the steady-state net photosynthetic ( $A_n$ ) rate as [7, 13]:

$$A_n = A_g - R_d \quad (1)$$

$$= \min(W_c, W_j, W_p) \left(1 - \frac{\Gamma^*}{c_c}\right) - R_d \quad (2)$$

where (1) defines  $A_n$  as the difference between the gross photosynthetic rate ( $A_g$ ) and  $R_d$ , the mitochondrial respiration which includes the release of CO<sub>2</sub> in light other than photo-respiration [13]. From (2) follows that  $A_n$  can be limited by the Rubisco limited carboxylation rate ( $W_c$ ), the electron transport limited carboxylation rate ( $W_j$ ) or the rate at which triose phosphates are utilised ( $W_p$ ). Opting to keep our model structure concise and the number of unknown system parameters to a minimum, we omit the limiting factor  $W_p$ .

### 1.2.1 The Rubisco limited carboxylation rate ( $W_c$ )

Once  $\text{CO}_2$  enters a leaf through the stomata, it diffuses through the inter-cellular spaces into the chloroplasts by means of a diffusion gradient between the chloroplast and the rest of the leaf. The numerous photosynthesis reactions that occur inside the chloroplast are summarised in the Calvin cycle, a process which comprises both light dependent and independent reactions.

During the first phase of this cycle, a single  $\text{CO}_2$  molecule is fixed onto a Ribulose 1,5-bisphosphate (RuBP) molecule to form *two* 3-Phosphoglyceric acid (3-PGA) molecules. Important here in the context of modelling enzyme kinetics is that this process is catalysed by the enzyme Ribulose-1,5-bisphosphate carboxylase/oxygenase (Rubisco), and its activation state is in turn increased by Rubisco activase. The structure of 3-PGA allows it to be combined and rearranged to form sugars which can be transported or stored for energy. The rate at which  $\text{CO}_2$  fixation takes place is known as the *carboxylation rate*. However, Rubisco also catalyses RuBP oxygenation (binding RuBP to  $\text{O}_2$ ). This reduces the efficiency of the Calvin cycle. The rate at which this takes place is called the oxygenation rate.

Mathematically, the Rubisco limited carboxylation rate is given as [7, 13, 14]:

$$W_c = V_{c_{max}} \frac{c_c}{c_c + K_c(1 + O_c/K_o)} \cdot \frac{[R]}{[R] + K_r'} \quad (3)$$

where  $V_{c_{max}}$  is the maximum obtainable carboxylation rate, and  $c_c$  is the partial pressure of  $\text{CO}_2$  in the chloroplast stroma whereas  $O_c$  is the partial pressure of  $\text{O}_2$  in the chloroplast stroma.  $K_c$  is the Michealis-Menten constant for  $\text{CO}_2$ ,  $K_o$  is the Michaelis-Menten constant for  $\text{O}_2$ ,  $[R]$  is the concentration of unbound (available) RuBP, and  $K_r'$  is the effective Michealis-Menten constant for RuBP. Assuming that RuBP is in excess, (3) reduces to [15],

$$W_c = V_{c_{max}} \frac{c_c}{c_c + K_c(1 + O_c/K_o)} \quad (4)$$

A relationship between  $W_c$  and the oxygenation rate is introduced in (2) by  $\Gamma^*$ , the  $\text{CO}_2$  concentration at which oxygenation proceeds at twice the rate of carboxylation causing the photosynthetic uptake of  $\text{CO}_2$  to be compensated for by the photorespiratory release of  $\text{CO}_2$  [16].

Notice that expression (4) is defined for  $\text{CO}_2$  concentrations in the chloroplast stroma ( $c_c$ ). This concentration can however not be measured directly and so is predicted if  $A_n$ ,  $c_i$ , and  $g_m$  are known, by,

$$c_c = c_i - \frac{A_n}{g_m} \quad (5)$$

where  $g_m$  is the mesophylllic conductance encountered along the  $\text{CO}_2$  diffusion pathway. By assuming that this conductance is infinitely large (5) simplifies to  $c_c = c_i$ .

### 1.2.2 Electron transport limited carboxylation rate ( $W_j$ )

The synthesis of RuBP also requires energy in the form of ATP and NADPH, and both ADP and  $\text{NADP}^+$  are continuously converted to these energy supplying molecules in *light dependent* reactions which are dependent on the rate of electron transport ( $J$ ). Accordingly, the electron transport limited carboxylation rate ( $W_j$ ) is given as [7, 13],

$$W_j = \frac{J}{(4 + 8 \frac{\Gamma^*}{c_c})} \quad (6)$$

Equation (6) assumes 4 electrons per carboxylation and oxygenation and so, based on the number of electrons required for NADP+ reduction, the standard values used are 4 and 8. However, there are uncertainties in the relationship between electron transport and ATP synthesis. For example, 4.5 and 10.5 have also been used [16].

Given the above mentioned assumptions, expression (2) can be written as

$$A_n = \min \left( \frac{V_{c_{max}} c_i}{c_i + K_c(1 + O_i/K_o)}, \frac{J}{4 + 8 \frac{\Gamma^*}{c_i}} \right) \left( 1 - \frac{\Gamma^*}{c_i} \right) - R_d \quad (7)$$

### 1.3 Temperature and light intensity effects on steady-state photosynthesis

The dependence of key FvCB model parameters on both leaf temperature ( $T_l$ ) and irradiance ( $I$ ) was already included in the 1980 publication by Farquhar *et. al.* [7].

Changes in the values of parameters  $\Gamma^*$ ,  $K_o$ , and  $K_c$  (in (7)) associated with leaf temperature changes are described using the Arrhenius equation [16],

$$\Gamma^*(T_l(t)) = e^{(c_1 - \frac{\Delta H_{a1}}{R_1 T_l(t)})} \quad (8)$$

$$K_o(T_l(t)) = e^{(c_2 - \frac{\Delta H_{a2}}{R_1 T_l(t)})} \quad (9)$$

$$K_c(T_l(t)) = e^{(c_3 - \frac{\Delta H_{a3}}{R_1 T_l(t)})} \quad (10)$$

Here, the ideal gas constant  $R_1$ , is expressed in units [ $\text{kJmol}^{-1}\text{K}^{-1}$ ]. Constants  $\Delta H_{ai}$  and  $c_i$ , where  $i = 1, \dots, 3$ , are the respective energies of activation and scaling constants for parameters  $\Gamma^*$ ,  $K_o$  and  $K_c$ .

Electron transport becomes limited when insufficient quanta are absorbed [7]. Accordingly,  $J$  is modelled as a function of irradiance [17],

$$J(I(t)) = \frac{J_{max} + \theta I(t) - \sqrt{(J_{max} + \theta I(t))^2 - 4J_{max}\gamma\theta I(t)}}{2\gamma} \quad (11)$$

where parameter  $J_{max}$  is the upper limit to potential chloroplast electron transport determined by the components of the chloroplast electron transport chain [13].

Parameters  $\theta$  and  $\gamma$  are unit-less (refer to S1 Supporting Information for details). All parameter values are given in Table (3).

## 2 Dynamic model structure

The model we present in this paper comprises only two ordinary differential equations, the first predicting the total stomatal conductance to  $\text{CO}_2$  diffusion ( $g_{tc}$ ) and the second the  $\text{CO}_2$  concentration inside the leaf ( $c_i$ ). Here,  $g_{tc}$  is the sum of the boundary layer and stomatal conductances (see S1 Supporting Information). An algebraic relation between the predicted states is used to approximate the net photosynthetic rate ( $A_n$ ). An overview of the dynamic states, system parameters, model inputs, and the measured output is given by the standard state-space representation,

$$\frac{d}{dt} \begin{bmatrix} g_{tc}(t) \\ c_i(t) \end{bmatrix} = \mathbf{f}(t, g_{tc}(t), c_i(t); k_u, k_d, c_3; I(t), c_a(t), T_l(t)) \quad (12)$$

$$y(t) = [g_{tc}(t), c_i(t), A_n(t)]' \quad (13)$$

Function  $\mathbf{f}$  is defined in equations (15)-(18). States  $g_{tc}$  and  $c_i$ , and the predicted  $A_n$  are measured model outputs. The three system parameters that need to be inferred

from the measured data are  $k_u$ ,  $k_d$  and  $c_3$  in expressions (10), and (15) and (16) respectively. Three environmental conditions,  $I(t)$ ,  $c_a(t)$  and  $T_1(t)$ , are directly measurable and modelled as inputs/disturbances to the system. Predictions for  $A_n$  are made using Fick's law of diffusion. Also known as the net flux of  $\text{CO}_2$  that enters a leaf, the dynamic  $A_n$  (achieved at a specific light intensity, as opposed to the attainable steady-state values predicted in (7)) is calculated as [18,19]

$$A_n(t) = g_{tc}(t)(c_a(t) - c_i(t)) \quad (14)$$

The asymmetric exponential response of stomata to increases and decreases in irradiance has often been reported [20]. This is modelled by introducing 2 time constants to the system,  $k_u$  describing the rate of increase in  $g_{tc}$  observed with an increase in irradiance, and  $k_d$  describing the rate of decrease in  $g_{tc}$  following a decrease in irradiance [9, 12, 20–24]. The resulting model structure is,

$$\frac{dg_{tc}(t)}{dt} = \frac{G(I(t), c_a(t)) - g_{tc}(t)}{k_u} \quad \text{if } \frac{dg_{tc}(t)}{dt} \geq 0 \quad (15)$$

$$\frac{dg_{tc}(t)}{dt} = \frac{G(I(t), c_a(t)) - g_{tc}(t)}{k_d} \quad \text{if } \frac{dg_{tc}(t)}{dt} < 0 \quad (16)$$

$G(I(t), c_a(t))$  can be interpreted as the steady-state target function of  $g_{tc}$  for a particular combination of  $I(t)$  and  $c_a(t)$ . A description of how  $G(I(t), c_c(t))$  should be calibrated is given in S1 Supporting Information.

The  $\text{CO}_2$  concentration inside the leaf is modelled using a mass balance equation (refer to S1 Supporting Information for a discussion),

$$\frac{dc_i(t)}{dt} = \frac{RT_l(t)}{dPa} [g_{tc}(t)(c_a(t) - c_i(t)) + R_d - \min(W_c(t), W_j(t)) \left(1 - \frac{\Gamma^*(T_l(t))}{c_i(t)}\right)] \quad (17)$$

The minimum function stems from the FvCB model in equation (7). Substituting the functions  $W_c(t)$  and  $W_j(t)$ , that have been adjusted to take  $T_1$  and  $I$  into account, into (17) gives,

$$\begin{aligned} \frac{dc_i(t)}{dt} = & \frac{RT_l(t)}{dPa} [g_{tc}(t)(c_a(t) - c_i(t)) + R_d \\ & - \min \left( \frac{V_{cmax}c_i(t)}{c_i(t) + K_c(T_l(t))[1 + \frac{O_i}{K_o(T_l(t))}]}, \frac{J(I(t))}{(4 + 8\frac{\Gamma^*(T_l(t))}{c_i(t)})} \right) \left(1 - \frac{\Gamma^*(T_l(t))}{c_i(t)}\right)] \end{aligned} \quad (18)$$

## 3 Materials and Methods

### 3.1 Growing conditions of plants

Tomato plants were cultivated in a climate chamber (size: 16 [m<sup>2</sup>]) in Wageningen University & Research, Wageningen, the Netherlands (52°N, 6°E). Seeds were germinated in rockwool plugs (diameter: 2 [cm]) and transferred to rockwool cubes (10×10×7 [cm]) one week after sowing.

Unless stated otherwise, day and night temperatures were set at 23°C and 20°C respectively. Relative humidity was set at 70%. The  $\text{CO}_2$  concentration was kept at ambient. Plants were irrigated automatically twice per day using an ebb & flow system (at 7 AM and 7 PM) with tomato nutrient solution (EC:2.2±0.1 [ $m\text{Scm}^{-1}$ ], pH:5.5) (see S1 Supporting Information).



### 3.1.1 Plants used to estimate $V_{\text{cmax}}$ and $R_d$

These plants were exposed to an irradiance of 250 [ $\mu\text{molm}^{-2}\text{s}^{-1}$ ] provided by two types of high-pressure sodium lamps (SON-T and HPI-T PLUS, Philips Lighting). The photoperiod in the chamber was 16 hours. The SON-T lamps were switched on one hour before the HPI-T PLUS lamps and were switched off one hour after the HPI-T PLUS lamps in an attempt to mimic the gradual increase and decrease of irradiance during sunrise and sunset.

### 3.1.2 Plants used to parameterise function $J(I(t))$

The plants were exposed to an average irradiance of 200 [ $\mu\text{molm}^{-2}\text{s}^{-1}$ ], with irradiance fluctuating between 50 and 500 [ $\mu\text{molm}^{-2}\text{s}^{-1}$ ] every minute. The photoperiod in the chamber was 16 hours. The irradiance pattern was randomly changed on a daily basis to simulate natural fluctuations in irradiance. Key properties including the photoperiod, minimum and maximum irradiance, daily average irradiance, and the overall shape of the light pattern were kept the same. Dynamic irradiance was provided by GreenPower LED top lighting compact modules (Philips Lighting).

### 3.1.3 Plants used to measure photosynthesis under natural fluctuating irradiance

The plants were brought to the greenhouse compartment to grow for another four weeks. Plants were grown on growth tables in the compartment of a Venlo-type glasshouse. One layer of cloth was put on the growth table and the greenhouse compartment had a photoperiod of 16 hours to allow for ample root growth. Only when global radiation outside the greenhouse dropped below 150 [ $\text{Wm}^{-2}$ ], were high-pressure sodium (HPS) lamps (600 [W], Philips) used during the light period. These were switched off when outside global radiation increased to values above 250 [ $\text{Wm}^{-2}$ ]. When the HPS lamps were on, the light intensity from these was approximately 150 [ $\mu\text{molm}^{-2}\text{s}^{-1}$ ] at plant level. The shading screen (HARMONY 4215 O FR, Ludvig Svensson) was closed when outside global radiation increased to values above 600 [ $\text{Wm}^{-2}$ ] and was opened when outside global radiation dropped below 500 [ $\text{Wm}^{-2}$ ]. Set points of day and night temperature were 22°C and 18°C respectively. Relative humidity was set at 65% and plants were irrigated four times per day with tomato nutrient solution (see S1 Supporting Information).

## 3.2 Measurements conducted

Unless stated otherwise, gas exchange measurements were conducted on the fourth or fifth leaf of four-week-old plants (after transplanting) using a portable gas exchange system (LI-6400XT, Li-Cor Bioscience) equipped with a 6 [ $\text{cm}^2$ ] leaf chamber fluorometer. Airflow was set to 500 [ $\mu\text{mols}^{-1}$ ] during measurements and relative humidity was controlled at 75%. Irradiance was provided by a mixture of red (90%) and blue (10%) LEDs in the fluorometer.

### 3.2.1 Measurements to estimate $V_{\text{cmax}}$ and $R_d$

Leaf temperature was kept around 25°C.  $\text{CO}_2$  response curves of photosynthesis ( $A_n/c_i$  curves) were measured by changing the atmospheric  $\text{CO}_2$  concentration in the following order: 400, 300, 200, 100, 50, 400, 400, 500, 600, 800, 1000, 1200 ppm while keeping the light intensity at 1800 [ $\mu\text{molm}^{-2}\text{s}^{-1}$ ]. Each  $\text{CO}_2$  concentration step took about 2-5 minutes to finish. Measured photosynthetic rates during  $A_n/c_i$  curve constructions were



corrected for diffusion leaks according to the Li-Cor manual [25]. In total, eight replicates were obtained (see S1 Supporting Information for details).

### 3.2.2 Measurements to parameterise function $J(I(t))$

Measurements were performed at an air temperature of 23°C, and at two atmospheric CO<sub>2</sub> concentrations: 400 ppm and 800 ppm. For each CO<sub>2</sub> concentration, the leaf was exposed to a respective irradiance of 0, 50, 100, 200, 400, 600, 800, 1000 and 1200 [ $\mu\text{molm}^{-2}\text{s}^{-1}$ ] for at least 45 minutes to allow both leaf net photosynthetic rate and stomatal conductance to reach steady-state. Six replicates were obtained for each CO<sub>2</sub> concentration (refer to S1 Supporting Information for details).

### 3.2.3 Measurements to track photosynthesis under natural fluctuating irradiance

Dynamic photosynthesis measurements were conducted between 3 and 24 September 2021 in a compartment (8×8 [m]) of a Venlo-type glasshouse located in Wageningen.

Measurements were conducted on leaves at the top of the plant that were fully exposed to sunlight and an air temperature of 23°C. Two sets of atmospheric CO<sub>2</sub> concentrations, i.e. 400 ppm and 800 ppm were used. The photosynthetically active radiation (PAR) in the leaf chamber fluorometer was continuously adjusted to match the readings from an adjacent PAR sensor placed next to the chamber.

Gas exchange data were logged every two seconds between approximately 9:00 to 16:00 hours. In total, five measured replicates were obtained at 400 ppm CO<sub>2</sub> and one measurement was taken at 800 ppm CO<sub>2</sub>.

## 3.3 Photosynthesis under naturally fluctuating irradiance: parameter estimation data set

Consider the set of observed greenhouse conditions shown in Fig.(1). The dynamics of the three model inputs,  $I(t)$ ,  $c_a(t)$  and  $T_l(t)$ , observed over a 6 hour period [09:37-15:33] were measured on 8 September 2021, with  $c_a(t)$  kept constant at 400 [ $\mu\text{molm}^{-2}\text{s}^{-1}$ ]. Notice that irradiance (Fig.(1).a) peaks during 3 stages, 30-70 [min], 105-170 [min], and again after 335 [min]. It reaches a maximum of approximately 1193 [ $\mu\text{molm}^{-2}\text{s}^{-1}$ ] for a brief period. For the majority of the day light levels fluctuate between 200 and 400 [ $\mu\text{molm}^{-2}\text{s}^{-1}$ ].

**Fig 1. Parameter estimation data set: model inputs measured on 8 September 2021.** (a) Measured irradiance ( $I$ ) [ $\mu\text{molm}^{-2}\text{s}^{-1}$ ] (b) Measured leaf temperature ( $T_l$ ) [K].

## 3.4 Parameter Estimation

Values for the 3 unknown system parameters,  $k_u$ ,  $k_d$  and  $c_3$ , were estimated using Matlab's global optimisation function, the genetic algorithm (ga). This method is well suited to the optimisation of highly nonlinear problems and problems with a discontinuous objective function [26]. The parameters were inferred by minimising the objective function,

$$O(k_u, k_d, c_3) \equiv \sqrt{\frac{\sum (0.2(g_{tc} - g_{tc,m})^2 + 0.2(c_i - c_{i,m})^2 + 0.6(A_n - A_{n,m})^2)}{N}} \quad (19)$$

where  $g_{tc,m}$ ,  $c_{i,m}$  and  $A_{n,m}$  denote the measured outputs defined in (13) and  $N$  is the number of observed data points, recorded every 2 seconds. By attributing weights to the individual terms, we ensured that an accurate prediction of the important metric  $A_n$  was favoured. Measured  $g_{tc}$  and  $A_n$  values are shown in blue in Fig.(5.a) and Fig.(5.b).

*Initial conditions:* Given that both  $g_{tc}$  and  $c_i$  are measured outputs, the initial conditions of the 2 state equations are known.

## 4 Results

### 4.1 Estimated parameter values

Figs.(2)-(4) show the converged results of the genetic algorithm optimisation. Here, this global search method generated 300 random parameter combinations from the 3-dimensional space bounded by the intervals as indicated in Figs.(2.a)-(4.a). These results reveal the frequency with which a particular parameter value was computed as optimal. In Fig.(3.a) for example, the algorithm converged after a certain number of iterations, and computed roughly 200 of the 300 optimal points on the interval [800,850] for parameter  $k_d$ .

**Fig 2. Global optimisation results for the stomatal parameter  $k_u$  in expression (15).** (a) The range of potential  $k_u$  values considered is shown along with the optimised  $k_u$  distribution. The genetic algorithm converged to a parameter value on the interval [170,180], with the optimised  $k_u=179.4$  [s]. (b) Objective function values: computed profile likelihood for a range of  $k_u$  values. The 95% confidence interval is shown in red as [157.5, 202.5] [s].

**Fig 3. Global optimisation results for the stomatal parameter  $k_d$  in expression (16).** (a) The range of potential  $k_d$  values considered is shown along with the optimised  $k_d$  distribution. The genetic algorithm converged to a parameter on the interval [800,850], with the optimised  $k_d=830.3$  [s]. (b) Objective function values: computed profile likelihood for a range of  $k_d$  values. The 95% confidence interval is shown in red as [735.6, 927.5] [s].

**Fig 4. Global optimisation results for parameter  $c_3$  in expression (10) used in (18).** (a) The range of potential  $c_3$  values considered is shown along with the optimised  $c_3$  distribution. The genetic algorithm converged to an optimal parameter value on the interval [37.9,38] as  $c_3=37.96$ . (b) Objective function values: computed profile likelihood for a narrow range of  $c_3$  values. The 95% confidence interval is shown in red as [37.95, 37.98] [s].

Notice that the derived time constants  $k_u=179.4$  [s] and  $k_d=830.3$  [s] suggest that for a leaf under natural fluctuating irradiance, the overall stomatal dynamics related to an increase in irradiance is faster than those associated with a decrease in irradiance.

The optimised  $c_3$  value 37.96 (see Fig.(4)) increases the value of  $W_c$  (defined in expression (4)) compared to this function's value computed using the commonly used  $c_3=38.28$  [27]. All parameter values in (15) and (16) are given in Table (2) with parameter values in (18) given in Table (3).

**Table 2. Values of the model parameters in expressions (15) and (16).** Parameters of the steady-state target function  $G(I(t), c_a(t))$  (indicated in blue), computed under  $c_a=400\text{ppm}$  and  $c_a=800\text{ppm}$  respectively, are also included. Estimated unknown system parameters are indicated in red with accompanying confidence intervals. Steady-state parameters estimated *a priori* are indicated in green.

| Parameter                                                        | Description                                                                    | Value                       |
|------------------------------------------------------------------|--------------------------------------------------------------------------------|-----------------------------|
| $k_u$ [s]                                                        | Time constant for increases in $g_{tc}$                                        | 179.4 [157.5,202.5]         |
| $k_d$ [s]                                                        | Time constant for decreases in $g_{tc}$                                        | 830.3 [735.6,927.5]         |
| $G(I(t), c_a(t))$ [ $\frac{\text{mol}}{\text{m}^2\text{s}}$ ]    | Steady-state target function for stomatal conductance                          | [S1 Supporting Information] |
| $g_{\text{min},400}$ [ $\frac{\text{mol}}{\text{m}^2\text{s}}$ ] | Minimum stomatal conductance under $c_a = 400\text{ppm}$                       | 0.1                         |
| $g_{\text{max},400}$ [ $\frac{\text{mol}}{\text{m}^2\text{s}}$ ] | Maximum stomatal conductance under $c_a = 400\text{ppm}$                       | 0.325                       |
| $\alpha_{400}$ [ $\frac{\text{mol}}{\mu\text{mol}}$ ]            | Slope of relation between steady-state $G$ and $I$ under $c_a = 400\text{ppm}$ | 0.00033                     |
| $g_{\text{min},800}$ [ $\frac{\text{mol}}{\text{m}^2\text{s}}$ ] | Minimum stomatal conductance under $c_a = 800\text{ppm}$                       | 0.165                       |
| $g_{\text{max},800}$ [ $\frac{\text{mol}}{\text{m}^2\text{s}}$ ] | Maximum stomatal conductance under $c_a = 800\text{ppm}$                       | 0.29                        |
| $\alpha_{800}$ [ $\frac{\text{mol}}{\mu\text{mol}}$ ]            | Slope of relation between steady-state $G$ and $I$ under $c_a = 800\text{ppm}$ | 0.00017                     |

**Table 3. Values of the model parameters in expression (18).** *A priori* estimated parameters of function  $J(I(t))$  and the respective steady-state parameters  $V_{\text{cmax}}$  and  $R_d$  are shown in green. The respective functions are indicated in blue and the estimated unknown system parameter is indicated in red with its accompanying confidence interval.

| Parameter                                                        | Description                               | Value                                       |
|------------------------------------------------------------------|-------------------------------------------|---------------------------------------------|
| $R$ [ $\frac{\text{m}^3\text{Pa}}{\text{molK}}$ ]                | Ideal gas constant                        | 8.314                                       |
| $d$ [m]                                                          | Leaf thickness                            | 0.0001 [10]                                 |
| $P_a$ [Pa]                                                       | Atmospheric pressure                      | 101325                                      |
| $V_{\text{cmax}}$ [ $\frac{\mu\text{mol}}{\text{m}^2\text{s}}$ ] | Maximum obtainable carboxylation rate     | 99.25                                       |
| $R_d$ [ $\frac{\mu\text{mol}}{\text{m}^2\text{s}}$ ]             | Mitochondrial respiration                 | 1                                           |
| $\Gamma^*(T_1) = e^{(c_1 - \frac{\Delta H_{a1}}{R_1 T_L})}$      | Rubisco compensation point                | [ $\frac{\mu\text{mol}}{\text{mol}}$ ] [27] |
| $c_1$                                                            | Scaling constant                          | 19.02 [27]                                  |
| $\Delta H_{a1}$ [ $\frac{\text{kJ}}{\text{mol}}$ ]               | Energy of activation of $\Gamma^*$        | 37.83 [27]                                  |
| $R_1$ [ $\frac{\text{kJ}}{\text{molK}}$ ]                        | Ideal gas constant                        | 0.008314 [27]                               |
| $K_o(T_1) = e^{(c_2 - \frac{\Delta H_{a2}}{R_1 T_L})}$           | Michaelis-Menten constant for $O_2$       | [kPa] [27]                                  |
| $c_2$                                                            | Scaling constant                          | 12.3772 [16]                                |
| $\Delta H_{a2}$ [ $\frac{\text{kJ}}{\text{mol}}$ ]               | Energy of activation of $K_o$             | 23.72 [16]                                  |
| $K_c(T_1) = e^{(c_3 - \frac{\Delta H_{a3}}{R_1 T_L})}$           | Michaelis-Menten constant for $CO_2$      | [ $\frac{\mu\text{mol}}{\text{mol}}$ ] [27] |
| $c_3$                                                            | Scaling constant                          | 37.96 [37.95,37.98]                         |
| $\Delta H_{a3}$ [ $\frac{\text{kJ}}{\text{mol}}$ ]               | Energy of activation of $K_c$             | 79.43 [27]                                  |
| $O_i$ [kPa]                                                      | Partial pressure of $O_2$ in air          | 21 [27]                                     |
| $J(I(t))$ [ $\frac{\mu\text{mol}}{\text{m}^2\text{s}}$ ]         | Electron transport rate                   | [see equation(11)]                          |
| $J_{\text{max}}$ [ $\frac{\mu\text{mol}}{\text{m}^2\text{s}}$ ]  | Maximum potential electron transport rate | 190.68                                      |
| $\theta$                                                         | Initial slope of $J$ versus $I$           | 0.41                                        |
| $\gamma$                                                         | Dimensionless convexity parameter         | 0.9                                         |

## 4.2 Photosynthesis under naturally fluctuating irradiance: parameter estimation

We parameterise the model using data measured on 8 September 2021 under natural fluctuating light as this contains rich information pertaining to fluctuations between  $W_c$  and  $W_j$  limitation (refer to Fig.(5.c)).

Predictions for  $g_{tc}$  are shown in red in Fig.(5.a). A 9% increase in predicted accuracy (from the objective function in (19)) was obtained by modelling  $g_{tc}$  with an asymmetric

**Fig 5. Results obtained after parameter estimation.** (a) Total stomatal conductance to CO<sub>2</sub> diffusion [ $\mu\text{molm}^{-2}\text{s}^{-1}$ ]. (b) Net photosynthetic rate [ $\mu\text{molm}^{-2}\text{s}^{-1}$ ] (c)  $\min(W_c, W_j)$  [ $\mu\text{molm}^{-2}\text{s}^{-1}$ ], indicates whether photosynthesis is limited by the carboxylation or electron transport rate.

as opposed to a symmetric response to irradiance (see S1 Supporting Information). 264

The dynamic relationship between the respective  $W_c$  and  $W_j$  limitations is shown in red in Fig.(5.c). Results indicate that Rubisco limited photosynthesis ( $W_c$ ) coincides with elevated levels of natural irradiance seen Fig.(1.a). The model predicts that photosynthesis is limited by the electron transport rate ( $W_j$ ) for the majority of the day, thus for irradiance levels that remain below 400 [ $\mu\text{molm}^{-2}\text{s}^{-1}$ ]. The correlation between  $A_n$  and the rate of electron transport  $J(I(t))$  is shown in Fig.(6). 265 266 267 268 269 270

**Fig 6. Results obtained after parameter estimation.** The correlation between  $A_n$  and the electron transport rate ( $J(I(t))$ ) is shown for both measured and simulated data sets.

### 4.3 Photosynthesis under natural fluctuating irradiance: model validation 271 272

We proceed by using the parameter values obtained in section (4.2) (given in Tables (2) and (3)) during model validation. The outcome is summarised in Table (4). 273 274

**Table 4. Greenhouse data measured under natural fluctuating irradiance. Summary of RMSEs computed to assess the accuracy of  $A_n$ .** Here  $RMSE = \sqrt{\sum (A_n - A_{n,m})^2 / N}$ , with the measured output denoted by  $A_{n,m}$ . Results comparing the use of the optimised parameter  $c_3=37.96$  to the original  $c_3=38.28$  [27] are shown. Experiments were conducted under 2 sets of ambient CO<sub>2</sub> concentrations, 400ppm and 800ppm respectively.  $R^2$  values are given in [ ].

| Data set ( $c_a=400\text{ppm}$ RH=75%)  | RMSE with $c_3=37.96$ | RMSE with $c_3=38.28$ |
|-----------------------------------------|-----------------------|-----------------------|
| Estimation set (8 Sept 2021) (Fig. 5)   | 0.747 [0.98]          | 2.082 [0.85]          |
| Validation set 1 (3 Sept 2021)          | 0.661 [0.98]          | 1.54 [0.88]           |
| Validation set 2 (6 Sept 2021) (Fig. 7) | 0.659 [0.99]          | 1.3 [0.95]            |
| Validation set 3 (23 Sept 2021)         | 0.998 [0.9]           | 0.936 [0.91]          |
| Validation set 4 (24 Sept 2021)         | 1.164 [0.91]          | 1.13 [0.92]           |
| Data set ( $c_a=800\text{ppm}$ RH=75%)  |                       |                       |
| Validation set 5 (7 Sept 2021) (Fig. 8) | 0.89 [0.97]           | 0.89 [0.97]           |

The results obtained for measurements taken on 6 Sept 2021 under an ambient CO<sub>2</sub> concentration of 400ppm are shown in Fig.(7), whilst the results for measurements conducted on 7 Sept 2021 under a CO<sub>2</sub> concentration of 800ppm are shown in Fig.(8). Both Figs.(7.b) and (8.b) show good agreement between measured and modelled  $A_n$ . Simulations shown in Fig.(8.c) suggest that when  $c_a$  is 800ppm, photosynthesis is solely limited by the electron transport rate. Furthermore, one observes similarities between the shapes of the modelled  $W_j$  and  $A_n$ . Given that  $W_{jc}$  is computed using  $J(I(t))$  from expression (11), this suggests that for tomato under the conditions reported here, it may be sufficient to use electron transport rates, inferred from steady-state data, in a dynamic setting. The correlation between  $A_n$  and  $J(I(t))$  is shown in Fig.(9). 275 276 277 278 279 280 281 282 283 284

**Fig 7. Model validation results obtained for measurements taken on 6 Sept 2021 with  $c_a=400\text{ppm}$ .** (a) Measured irradiance [ $\mu\text{molm}^{-2}\text{s}^{-1}$ ]. (b) Net photosynthetic rate [ $\mu\text{molm}^{-2}\text{s}^{-1}$ ] (c)  $\min(W_c, W_j)$  [ $\mu\text{molm}^{-2}\text{s}^{-1}$ ], indicates whether photosynthesis is limited by the carboxylation or electron transport rate.

**Fig 8. Model validation results obtained for measurements taken on 7 Sept 2021 with  $c_a=800\text{ppm}$ .** (a) Measured irradiance [ $\mu\text{molm}^{-2}\text{s}^{-1}$ ]. (b) Net photosynthetic rate [ $\mu\text{molm}^{-2}\text{s}^{-1}$ ] (c)  $\min(W_c, W_j)$  [ $\mu\text{molm}^{-2}\text{s}^{-1}$ ], indicates whether photosynthesis is limited by the carboxylation or electron transport rate.

**Fig 9. Results obtained for the validation data set measured on 7 Sept 2021 under elevated  $c_a = 800\text{ppm}$ .** The correlation between  $A_n$  and the electron transport rate ( $J(I(t))$ ) is shown for both measured and simulated data sets.

## 5 Discussion

It is highly unlikely that  $A_n$  is in steady-state under natural fluctuating irradiance conditions and so observing natural dynamic as opposed to step-change responses to light is useful in aiding our understanding of this key photosynthetic property. However, nonsteady-state photosynthesis is often overlooked, with kinetic measurements of  $A_n$  reported less due to the complexity associated with measuring and analysing them [28].

We set out to develop a fit-for-purpose dynamic photosynthesis model. The model is both calibrated and validated using measurements taken under naturally fluctuating greenhouse conditions. Sufficiently accurate  $A_n$  predictions in section (4) suggest that the model (given in expressions (15)-(17)) can potentially be used in greenhouse lighting control applications.

**Model** - Our model comprises 2 ODEs, predicting the total stomatal conductance to  $\text{CO}_2$  ( $g_{tc}$ ) diffusion and the  $\text{CO}_2$  concentration inside a leaf ( $c_i$ ). These predictions are required to compute the net photosynthetic rate ( $A_n$ ) using Fick's law of diffusion (expression (14)). Our results show that satisfactory fit for purpose  $A_n$  values can be obtained by merely predicting the elements that comprise Fick's law of diffusion.

The dynamic binding of  $\text{CO}_2$  inside a leaf is modelled using the FvCB model that has been adapted the predict steady-state  $J$  values at different light intensities (see section (1.3)). Here, we used this application in a dynamic setting, defining the dynamic electron transport rate function,  $J(I(t))$ . It does not include the process of how  $J$  gradually increases after light increase.

Given that parameter  $V_{cmax}$  is estimated from *a priori*  $A/c_i$  measurements (see S1 Supporting Information for details), we chose to optimise a parameter used to describe the temperature dependence of the Michaelis-Menten constant for  $\text{CO}_2$ ,  $c_3$ , to increase the accuracy of our  $A_n$  predictions (see Table (4)).

The model is unique given its small size and the fact that it only comprises 3 unknown system parameters. We opt not to predict any detailed molecule concentrations such as RuBP (see [19] for example), and by assuming that the leaf is homogeneous, we do not include an additional equation that accounts for mesophyll conductance (see [11] for example).

Furthermore, for  $V_{cmax}$  as defined in the FvCB model [7], we too assume is that Rubisco is activated [29]. Predictions for  $A_n$  reported for tomato suggest that adequate  $A_n$  values can be obtained under this stringent model assumption.

Finally, it is important to realise that the implementation of a system which contains the FvCB model necessitates the *a priori* calculation of a multitude of species specific steady-state parameters. This requires repeated experimental measurements and some background knowledge on how to interpret and assimilate data.

**Results** - The first interesting point that emerges from using rapid fluctuating measurements to calibrate a model is the inferred time constants pertaining to the total stomatal conductance to CO<sub>2</sub> diffusion. Notice from Table (2) that  $k_u$ , associated with an increase in irradiance is faster than  $k_d$ . When inferring these parameter values from data measured after a single step change in irradiance,  $k_u$  is slower than  $k_d$ .

We highlighted the correlation between  $A_n$  and the electron transport rate in section (4) (see Figs. (6) and (9)). We know that the formation of ATP and NADPH molecules are dependent on the rate of electron transport and that this is light dependent. Accordingly, we observe a strong linear relationship between  $A_n$  and  $J$  under low irradiance levels. This indicates that under such conditions, photosynthesis is  $W_j$  limited. Accurate results shown in Figs.(7) and (8.b) in particular, suggest that: 1) it is sufficient to use an electron transport rate function, at least for our greenhouse-grown tomato leaves, calibrated using steady-state values at different irradiance levels, in a dynamic setting, and 2) the calibration of this function i.e. the parameter values  $J_{max}$ ,  $\theta$  and  $\gamma$ , is critically important.

## 6 Conclusions

The importance of monitoring nonsteady-state responses to natural fluctuations in irradiance for improving crop photosynthesis has gained substantial support in recent years [30]. Our aim was to develop a small fit-for-purpose dynamic photosynthesis model that can be used in supplemental lighting control applications in greenhouses. We set out to build a model that accurately predicts the net photosynthetic rate ( $A_n$ ) by taking plant physiology into account, and both calibrated and validated our model using nonsteady-state data measured under rapid fluctuating light conditions.

Four main points have emerged from our analysis:

1. We corroborated the added value of accounting for differences in stomatal responses to both increasing and decreasing fluctuations in irradiance. We observed a 9% increase in model accuracy when using 2 different time constants to describe the total stomatal conductance to CO<sub>2</sub> (refer to S1 Supporting Information).  
In contrast, we observed no significant increase in the predicted accuracy of  $A_n$  when modelling the steady-state target function of the total stomatal conductance to CO<sub>2</sub>, denoted by  $G$ , as a function of both irradiance and ambient CO<sub>2</sub> concentration (refer to S1 Supporting Information).
2. We showed that incorporating the FvCB equations into a dynamic model is sufficient for obtaining accurate fit for purpose  $A_n$  predictions under rapid natural light fluctuations. In particular, we found that the *a priori* parameterisation of the steady-state electron transport rate with respect to different irradiance levels ( $J(I(t))$ ) is very effective in capturing the dynamics of photosynthesis in tomato leaves.
3. We showed the added value of optimising a parameter in one of the Michaelis-Menten constants in the FvCB model. Here, we opted to adjust parameter  $c_3$  related to  $K_n$ . Its value is often used from literature, despite being calibrated for different plant species. This cautions us when we are simply using parameter values from literature derived for different plant species.
4. We showed that satisfactory photosynthesis results can be obtained even when a model does not account for complex biological factors such as enzymatic inhibition, liquid-gas interactions or chloroplast movement.



## Supporting information

369

**S1 Supporting Information. A small dynamic leaf-level model predicting photosynthesis in greenhouse tomatoes.**

370

371

## Acknowledgements

372

Funding: This work was supported by the The Dutch Research Council under the project titled SOLARIS: Sensor-assisted Optimisation of greenhouse crop Light use by Adjustment of Realised Induction State (TTW project number: 17173).

373

374

375

## References

1. Kaiser E, Kromdijk J, Harbinson J, Heuvelink E, Marcelis LF. Photosynthetic induction and its diffusional, carboxylation and electron transport processes as affected by CO<sub>2</sub> partial pressure, temperature, air humidity and blue irradiance. *Annals of Botany*. 2017;119(2):191–205. doi:10.1093/aob/mcw226.
2. Kuijpers WJP, Katzin D, van Mourik S, Antunes DJ, Hemming S, van de Molengraft MJG. Lighting systems and strategies compared in an optimally controlled greenhouse. *Biosystems Engineering*. 2021;202:195–216. doi:<https://doi.org/10.1016/j.biosystemseng.2020.12.006>.
3. Slattery RA, Walker BJ, Weber APM, Ort DR. The Impacts of Fluctuating Light on Crop Performance. *Plant Physiology*. 2017;176(2):990–1003. doi:10.1104/pp.17.01234.
4. Assmann SM, Wang XQ. From milliseconds to millions of years: guard cells and environmental responses. *Current Opinion in Plant Biology*. 2001;4(5):421–428. doi:10.1016/S1369-5266(00)00195-3.
5. Long SP, Zhu X, Naidu SL, Ort DR. Can improvement in photosynthesis increase crop yields? *Plant, Cell & Environment*. 2006;29(3):315–330. doi:10.1111/j.1365-3040.2005.01493.x.
6. Liu T, Barbour MM, Yu D, Rao S, Song X. Mesophyll conductance exerts a significant limitation on photosynthesis during light induction. *New Phytologist*. 2022;233(1):360–372. doi:<https://doi.org/10.1111/nph.17757>.
7. Farquhar GD, von Caemmerer S, Berry JA. A Biochemical Model of Photosynthetic CO<sub>2</sub> Assimilation in Leaves of C<sub>3</sub> Species. *Planta*. 1980;149:78–90.
8. von Caemmerer S. Steady-state models of photosynthesis. *Plant, Cell & Environment*. 2013;36(9):1617–1630. doi:<https://doi.org/10.1111/pce.12098>.
9. Pearcy RW, Gross LJ, He D. An improved dynamic model of photosynthesis for estimation of carbon gain in sunfleck light regimes. *Plant, Cell & Environment*. 1997;20(4):411–424. doi:10.1046/j.1365-3040.1997.d01-88.x.
10. Noe SM, Giersch C. A simple dynamic model of photosynthesis in oak leaves: coupling leaf conductance and photosynthetic carbon fixation by a variable intracellular CO<sub>2</sub> pool. *Funct Plant Biol*. 2004;31(12):1195–1204. doi:10.1071/FP03251.



11. Vialet-Chabrand S, Matthews JSA, Brendel O, Blatt MR, Wang Y, Hills A, et al. Modelling water use efficiency in a dynamic environment: An example using *Arabidopsis thaliana*. *Plant Science*. 2016;251:65–74.
12. Vialet-Chabrand SRM, Matthews JSA, McAusland L, Blatt MR, Griffiths H, Lawson T. Temporal Dynamics of Stomatal Behavior: Modeling and Implications for Photosynthesis and Water Use. *Plant Physiology*. 2017;174(2):603–613. doi:10.1104/pp.17.00125.
13. von Caemmerer S, Farquhar G, Berry J. In: *Biochemical Model of C3 Photosynthesis*. vol. 29; 2009. p. 209–230.
14. Walker AP, Beckerman AP, Gu L, Kattge J, Cernusak LA, Domingues TF, et al. The relationship of leaf photosynthetic traits -  $V_{cmax}$  and  $J_{cmax}$  - to leaf nitrogen, leaf phosphorus, and specific leaf area: a meta-analysis and modeling study. *Ecology and evolution*. 2014;4(16):3218–3235. doi:10.1002/ece3.1173.
15. Farquhar GD. Models Describing the Kinetics of Ribulose Biphosphate Carboxylase-Oxygenase. *Archives of Biochemistry and Biophysics*. 1979;194(2):456–468.
16. Sharkey TD, Bernacchi CJ, Farquhar GD, Singaas EL. Fitting photosynthetic carbon dioxide response curves for  $C_3$  leaves. *Plant, Cell & Environment*. 2007;176(2):402–414. doi:10.1111/j.1469-8137.2007.02182.x.
17. Buckley TN, Diaz-Espejo A. Reporting estimates of maximum potential electron transport rate. *New Phytologist*. 2015;205:14–17.
18. Lommen PW, Smith SK, Yocum CS, Gates DM. In: Gates DM, Schmerl RB, editors. *Photosynthetic Model*. Berlin, Heidelberg: Springer Berlin Heidelberg; 1975. p. 33–43.
19. Morales A, Kaiser E, Yin X, Harbinson J, Molenaar J, Driever SM, et al. Dynamic modelling of limitations on improving leaf  $CO_2$  assimilation under fluctuating irradiance. *Plant, Cell & Environment*. 2018;41(3):589–604. doi:10.1111/pce.13119.
20. Ooba M, Takahashi H. Effect of asymmetric stomatal response on gas-exchange dynamics. *Ecological Modelling*. 2003;164(1):65–82. doi:10.1016/S0304-3800(03)00012-7.
21. Bellasio C. A generalised dynamic model of leaf-level  $C_3$  photosynthesis combining light and dark reactions with stomatal behaviour. *Photosynthesis Research*. 2018; p. 1–20.
22. Kirchbaum MUF, Gross LJ, Pearcy RW. Observed and modelled stomatal responses to dynamic light environments in the shade plant *Alocasia macrorrhiza*. *Plant, Cell & Environment*. 1988;11(2):111–121. doi:10.1111/1365-3040.ep11604898.
23. Knapp AK. Gas Exchange Dynamics in  $C_3$  and  $C_4$  Grasses: Consequence of Differences in Stomatal Conductance. *Ecology*. 1993;74(1):113–123.
24. Vico G, Manzoni S, Palmroth S, Katul G. Effects of stomatal delays on the economics of leaf gas exchange under intermittent light regimes. *Ecology*. 2011;192(3):640–652.

25. Biosciences LC. Using the LI-6400 / LI-6400 XT Portable Photosynthesis System. Lincoln, Nebraska: LI-COR Biosciences; 2011.
26. Mathworks. What Is the Genetic Algorithm?; 2021. Available from: <https://nl.mathworks.com/help/gads/what-is-the-genetic-algorithm.htm>.
27. Bernacchi CJ, Portis AR, Nakano H, von Caemmerer S, Long SP. Temperature Response of Mesophyll Conductance. Implications for the Determination of Rubisco Enzyme Kinetics and for Limitations to Photosynthesis in Vivo. *Plant Physiology*. 2002;130(4):1992–1998. doi:10.1104/pp.008250.
28. Kaiser E, Zhou D, Heuvelink E, Harbinson J, Morales A, Marcelis L. Elevated CO<sub>2</sub> increases photosynthesis in fluctuating irradiance regardless of photosynthetic induction state. *Journal of experimental botany*. 2017;68(20):5629–5640. doi:10.1093/jxb/erx357.
29. Bellasio C. A generalised dynamic model of leaf-level C<sub>3</sub> photosynthesis combining light and dark reactions with stomatal behaviour. *Photosynthesis Research*. 2019;141:99–118. doi:10.1007/s11120-018-0601-1.
30. Long SP, Taylor SH, Burgess SJ, Carmo-Silva E, Lawson T, De Souza AP, et al. Into the Shadows and Back into Sunlight: Photosynthesis in Fluctuating Light. *Annual Review of Plant Biology*. 2022;73(1):617–648. doi:10.1146/annurev-arplant-070221-024745.

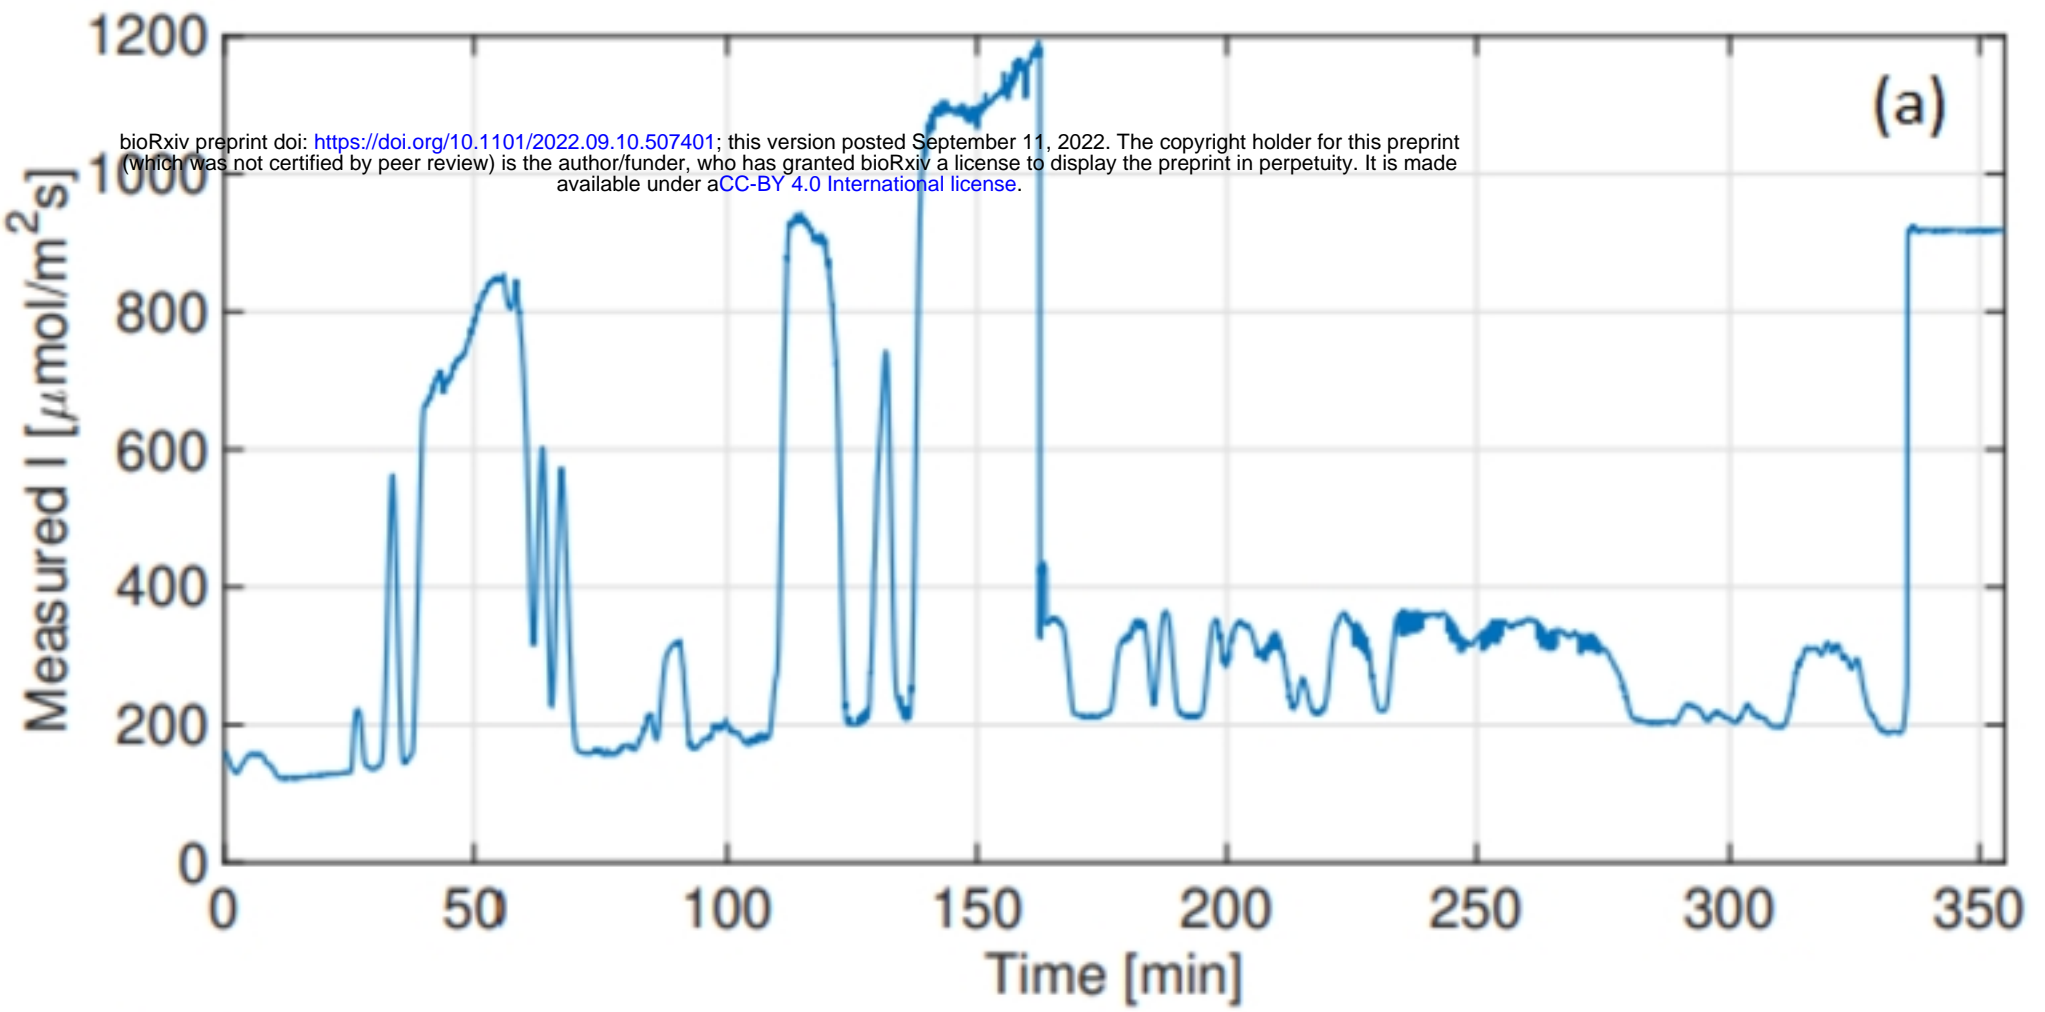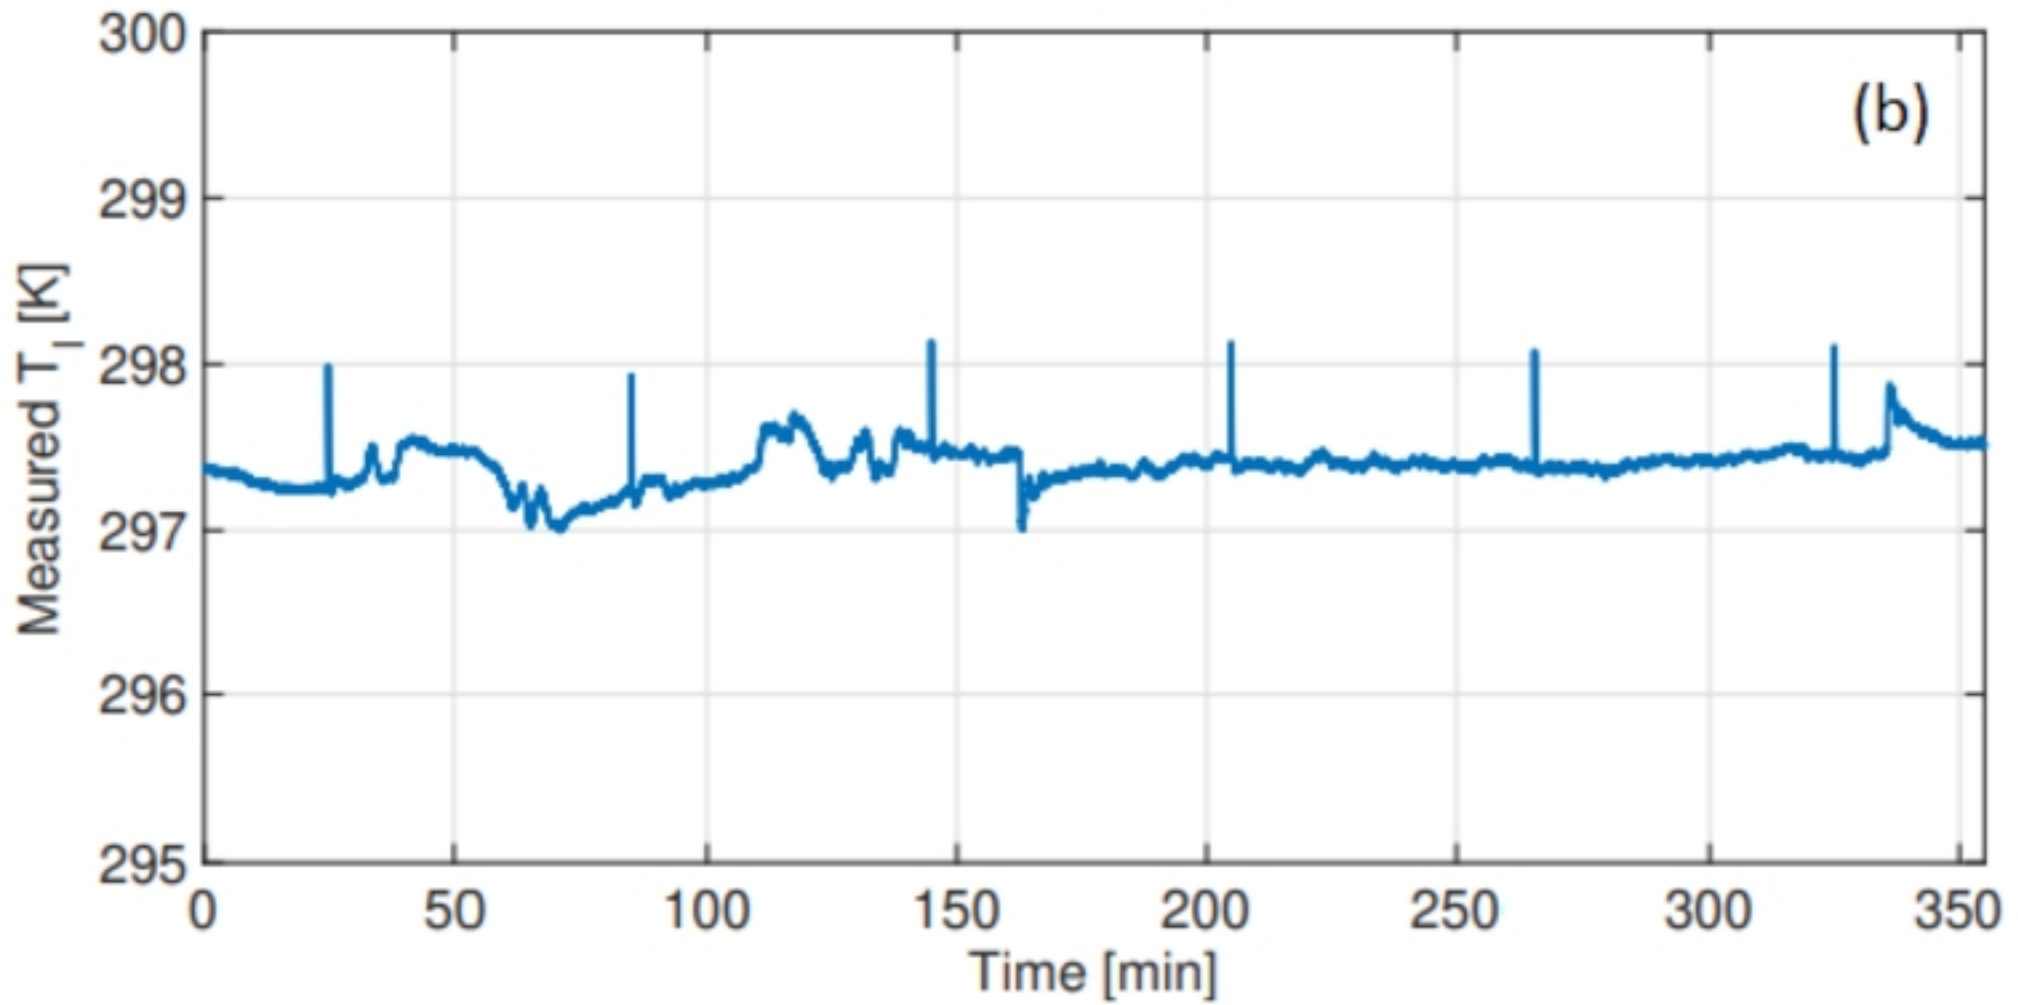

Figure 1

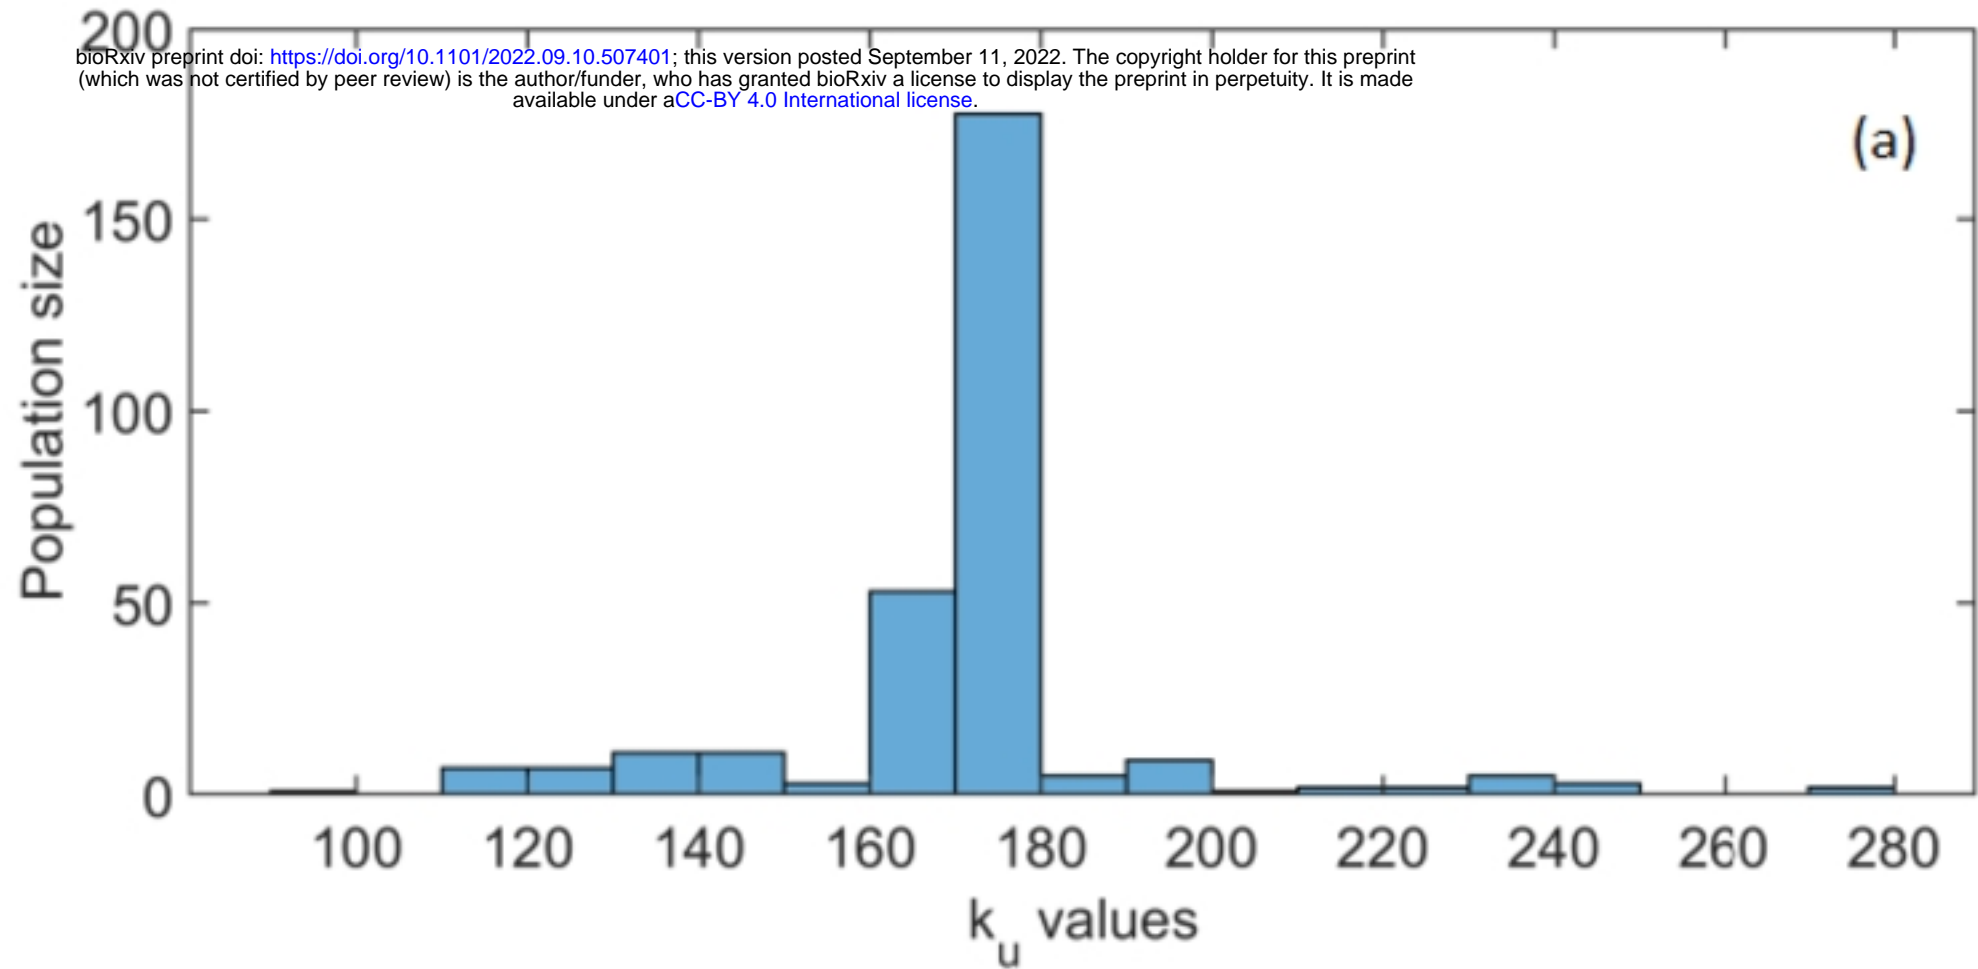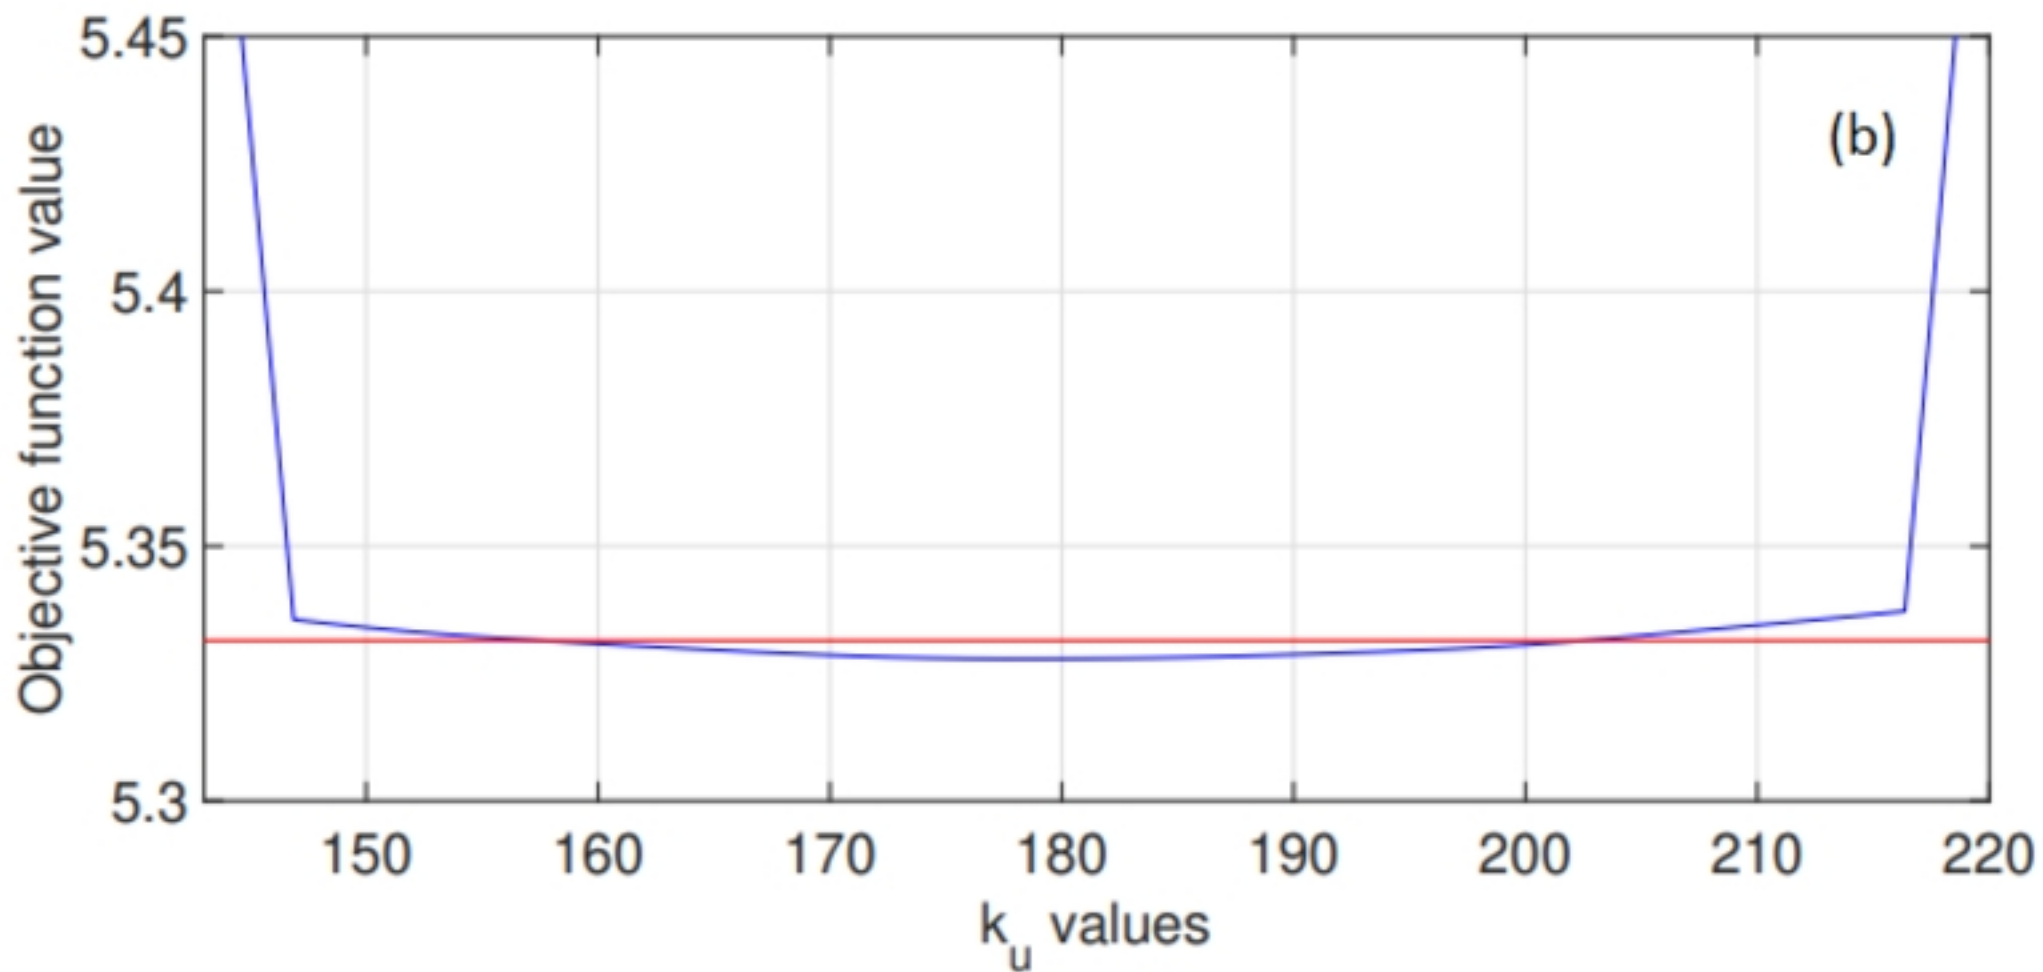

Figure 2

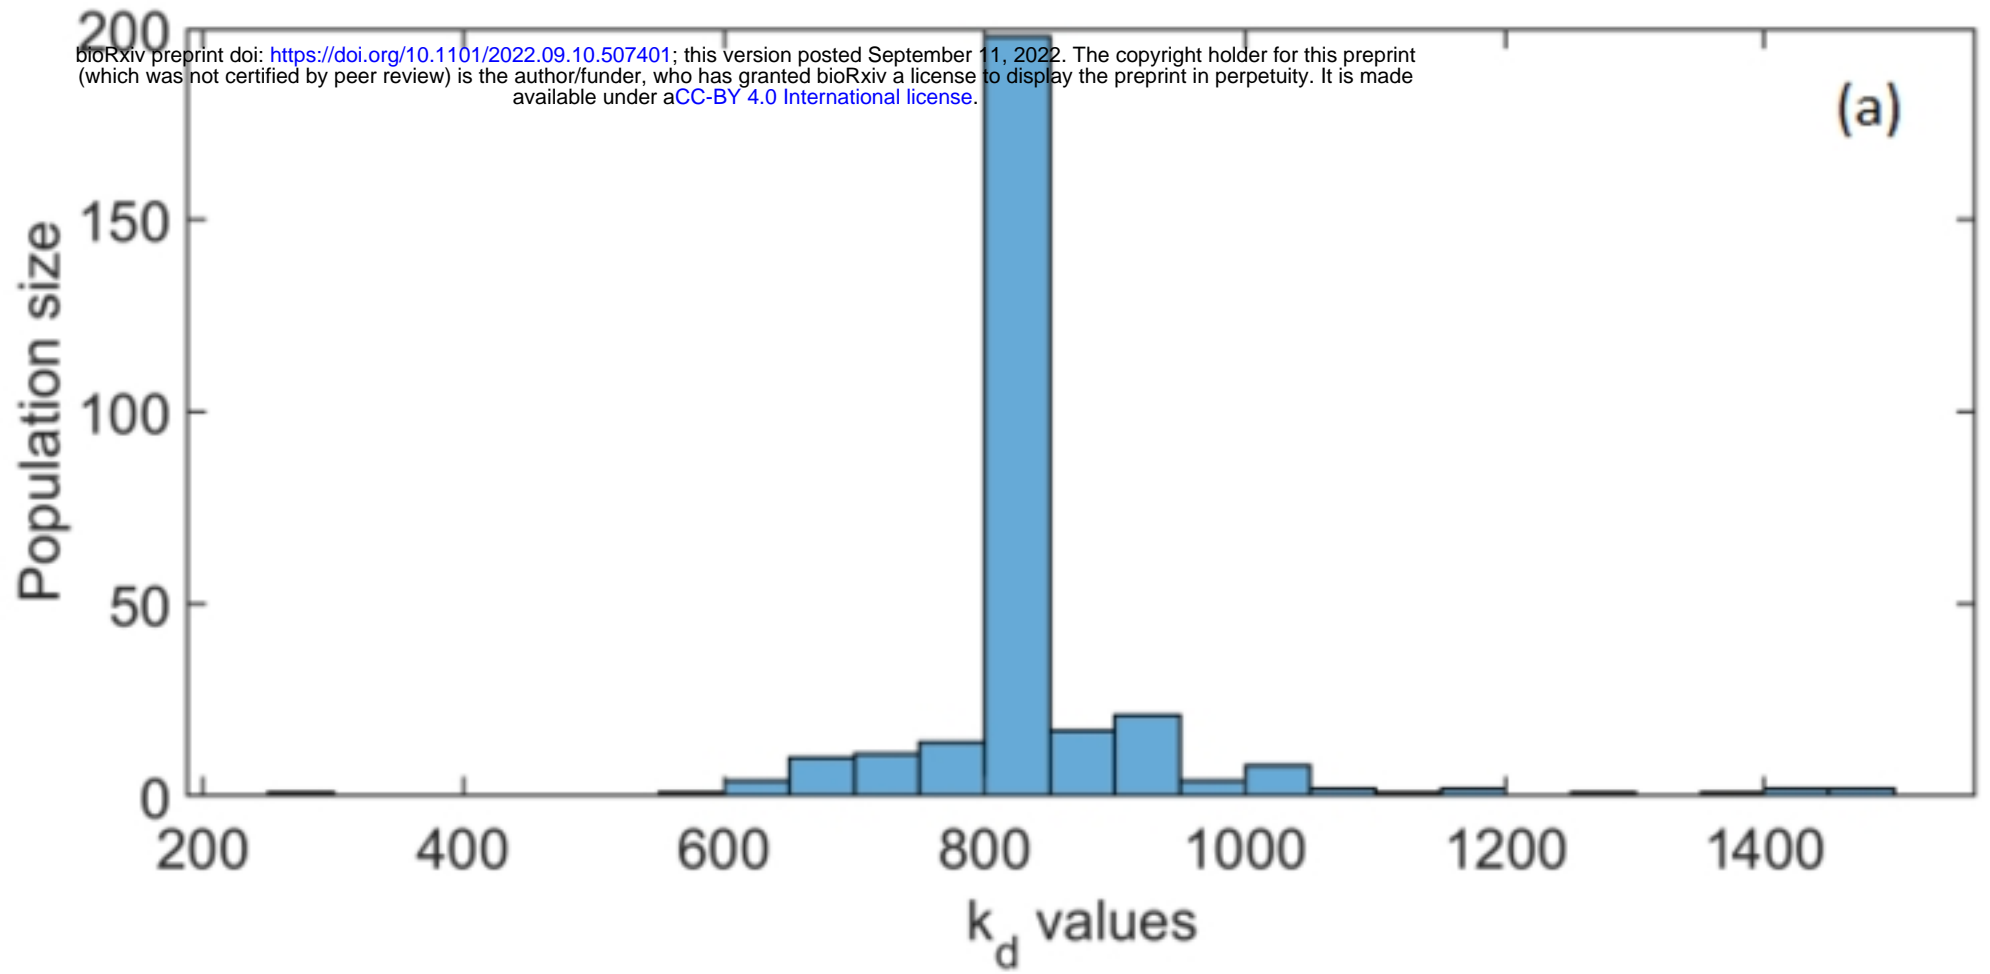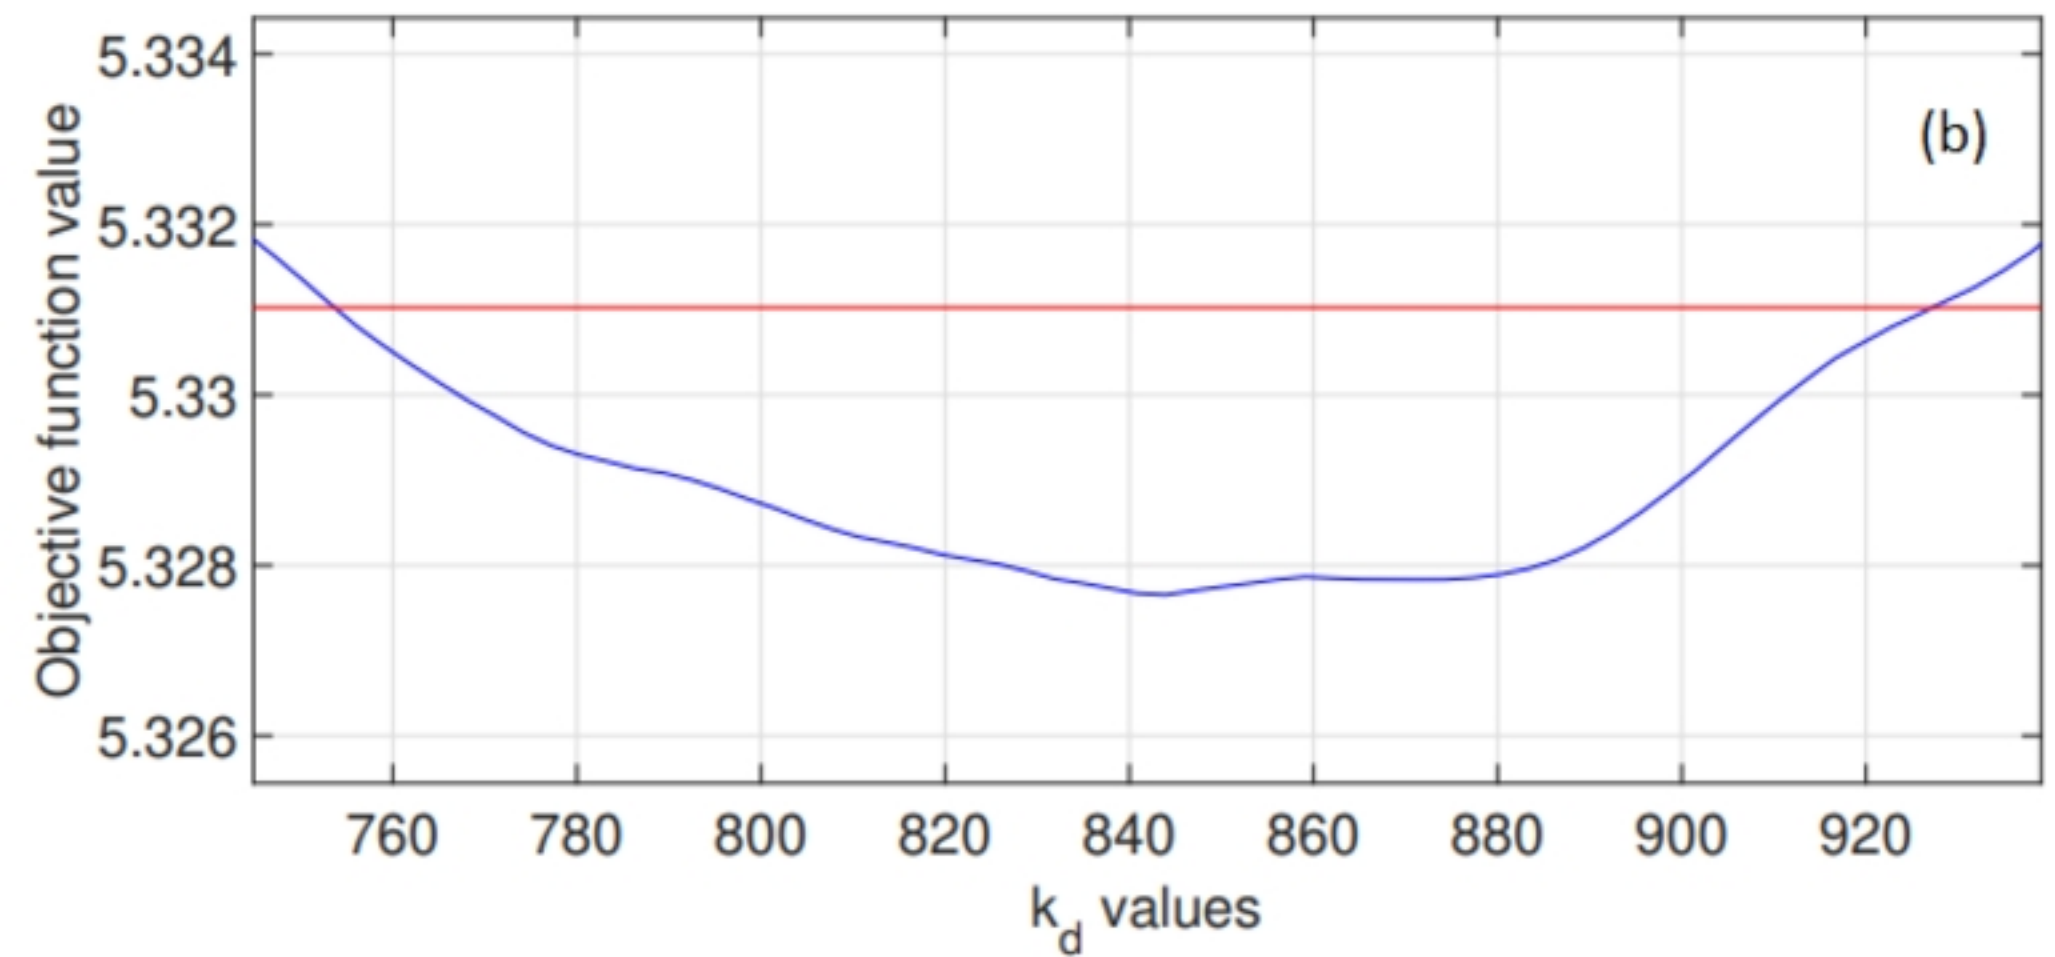

Figure 3

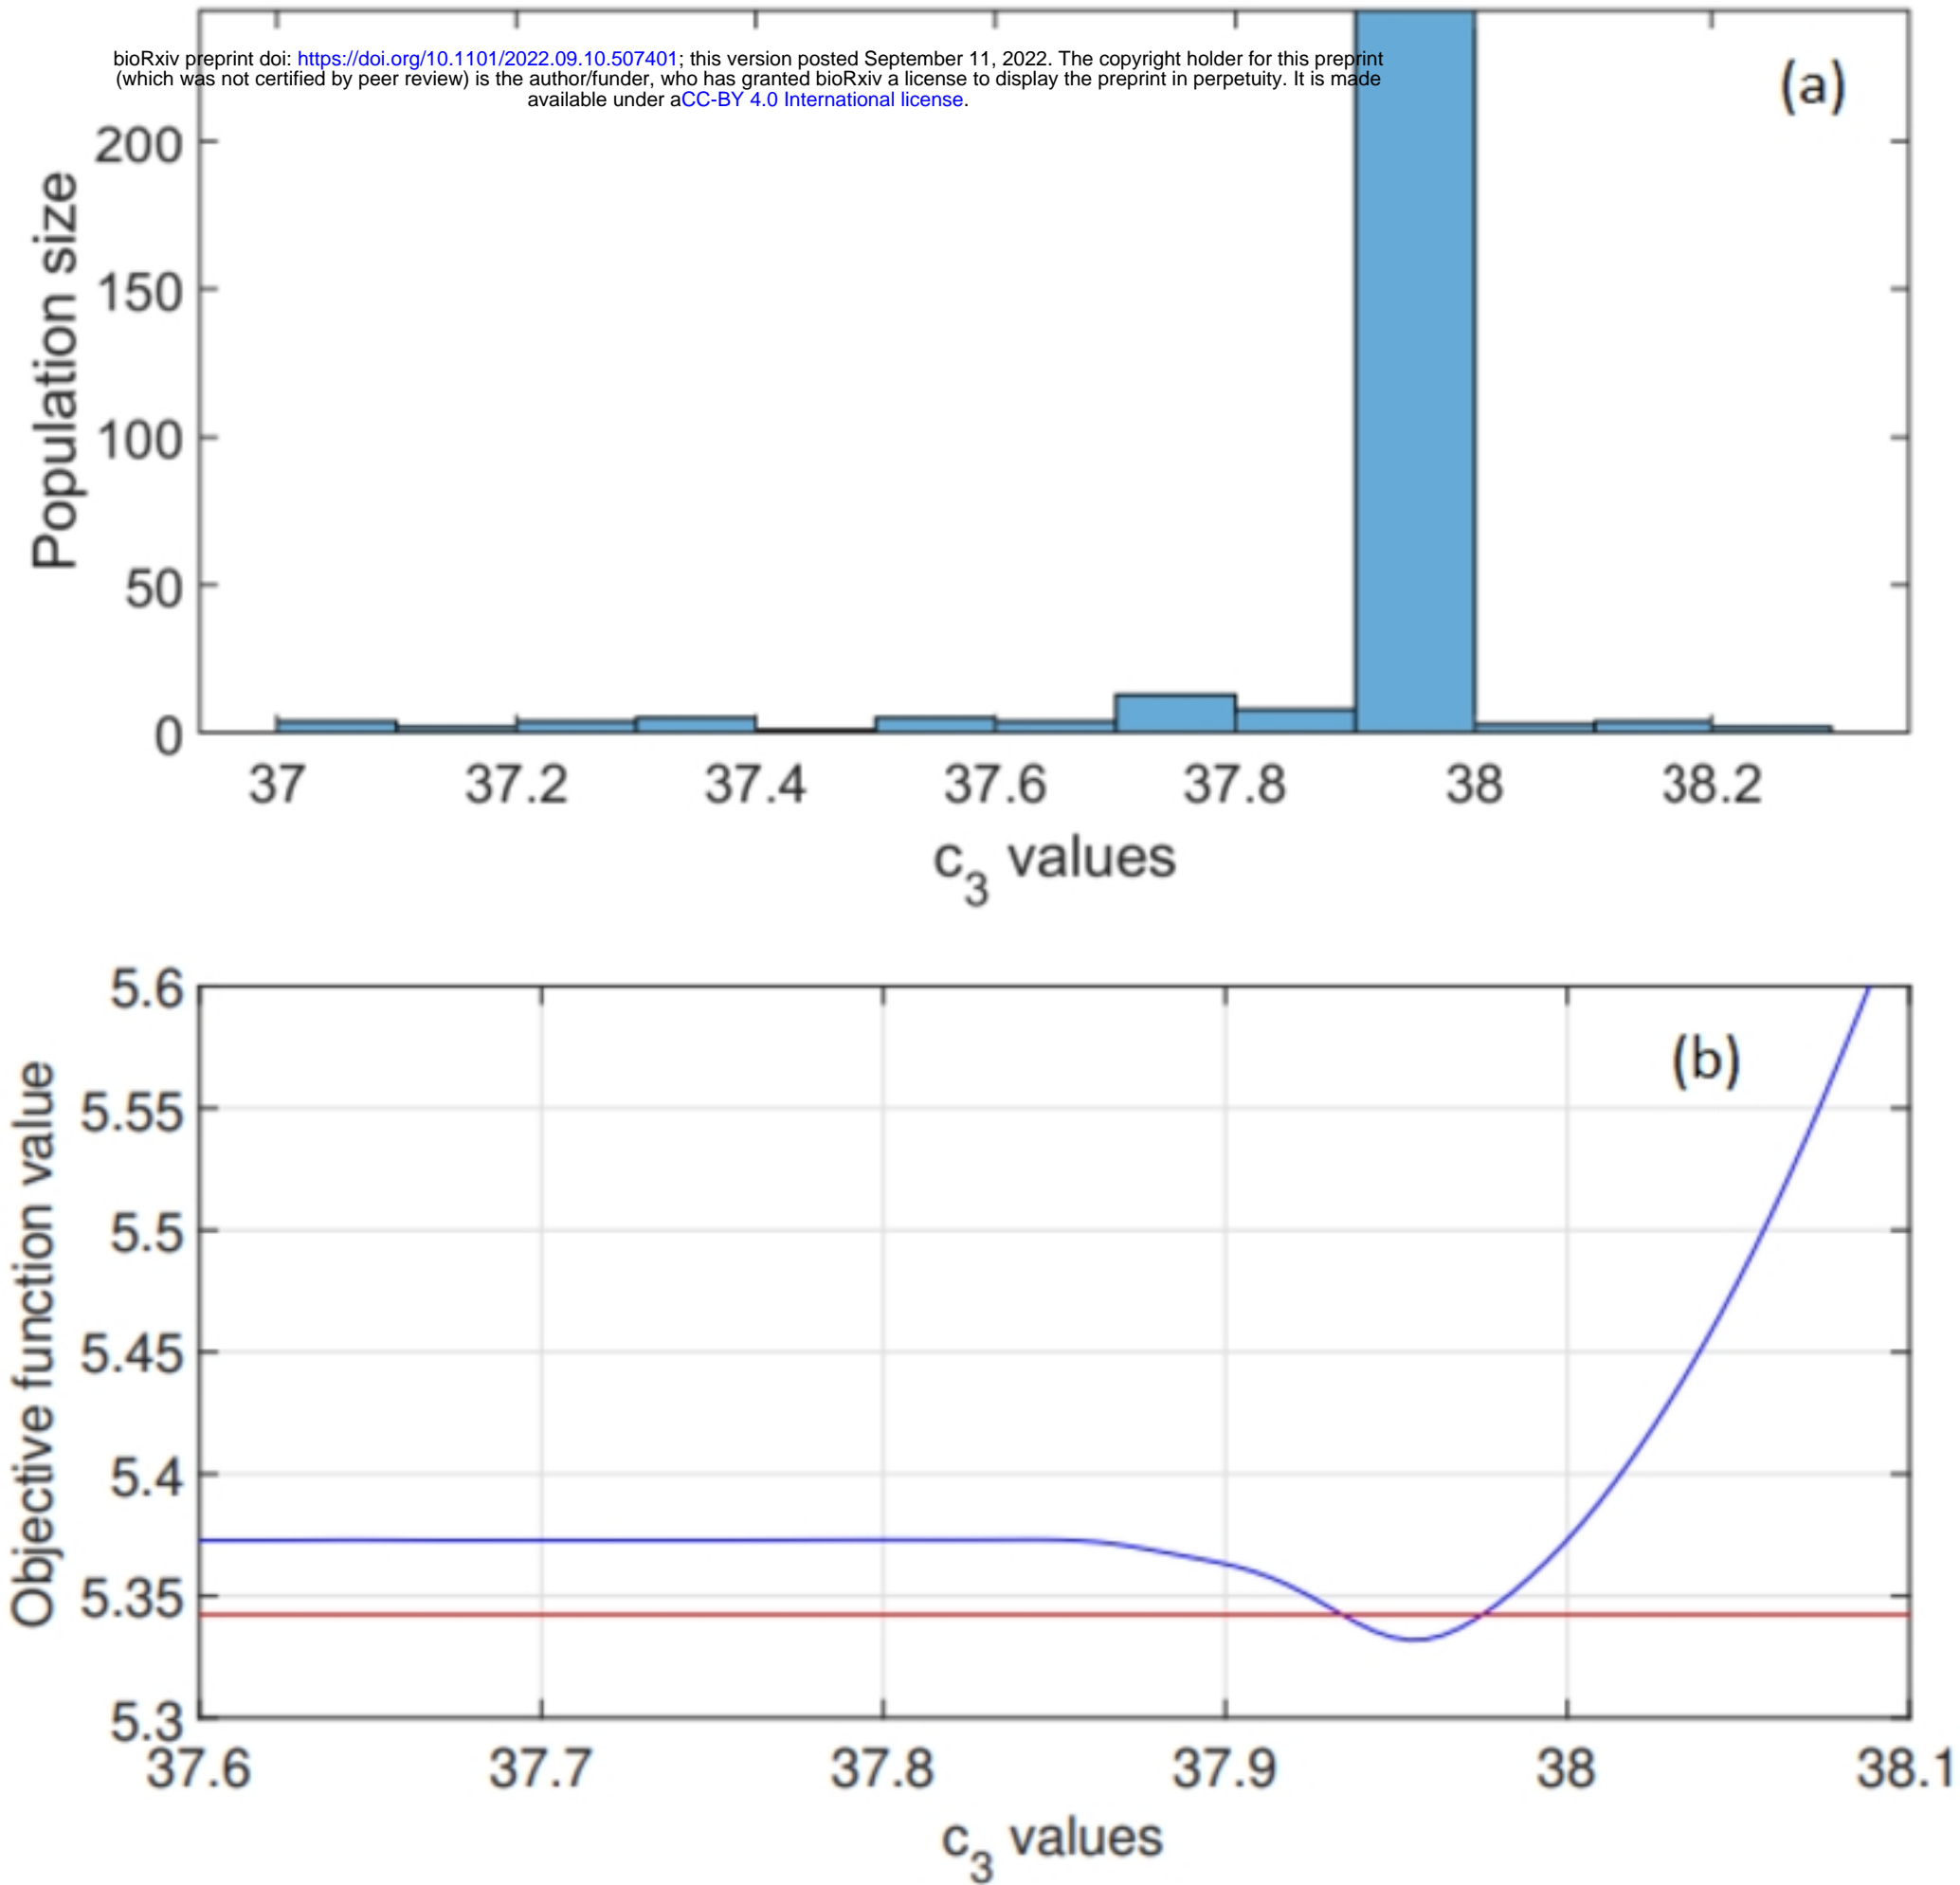

Figure 4



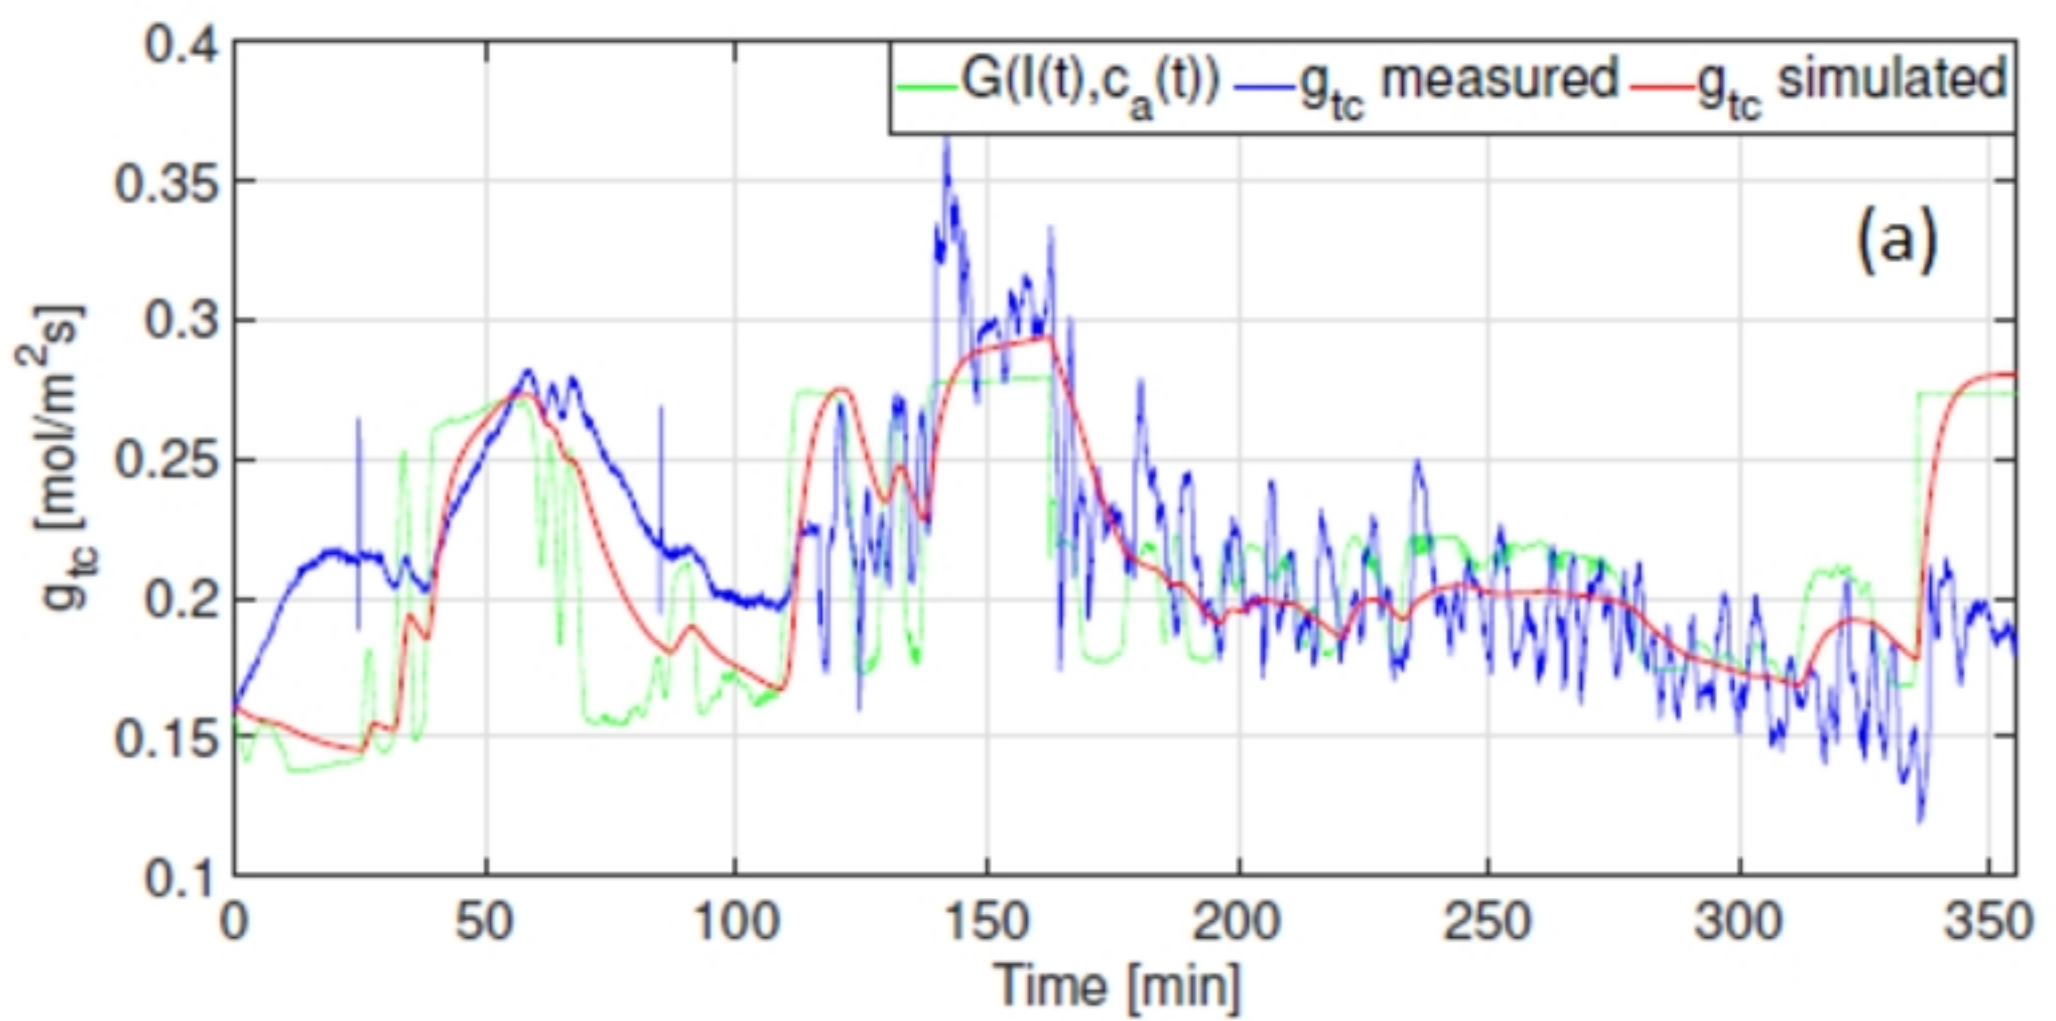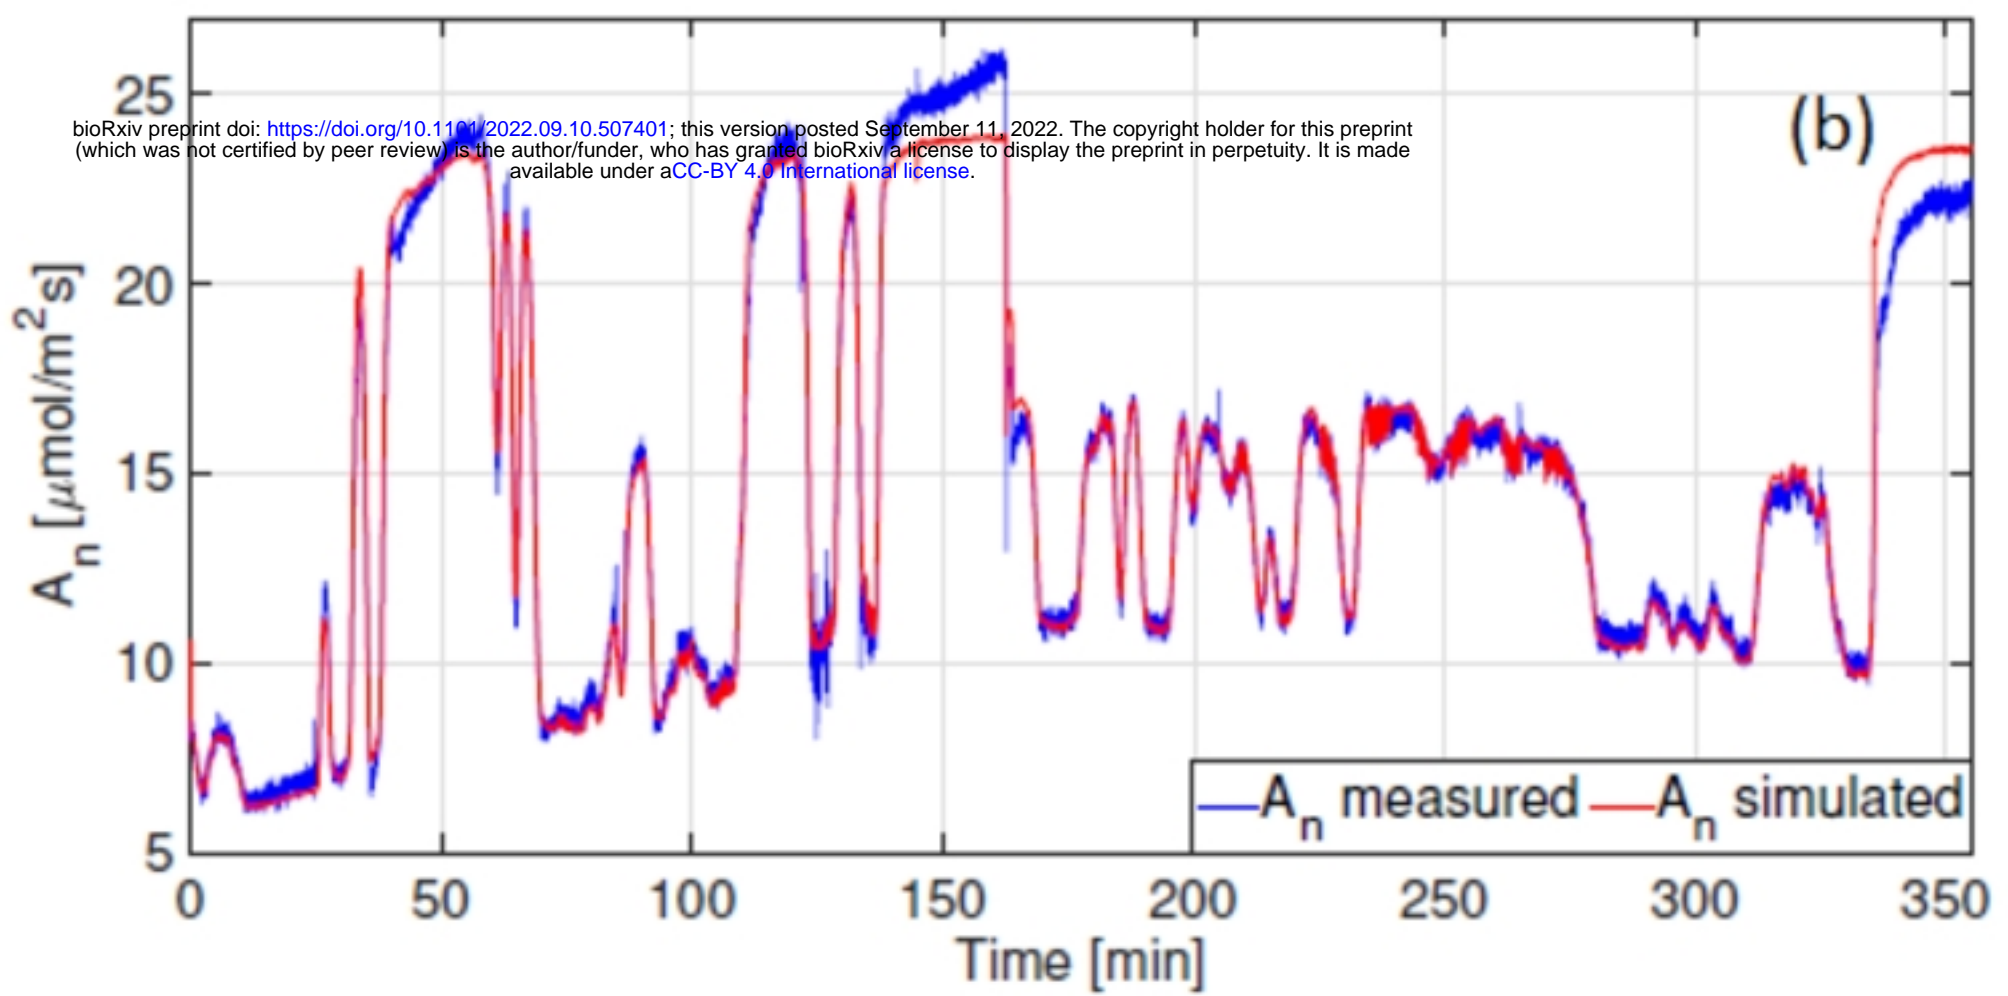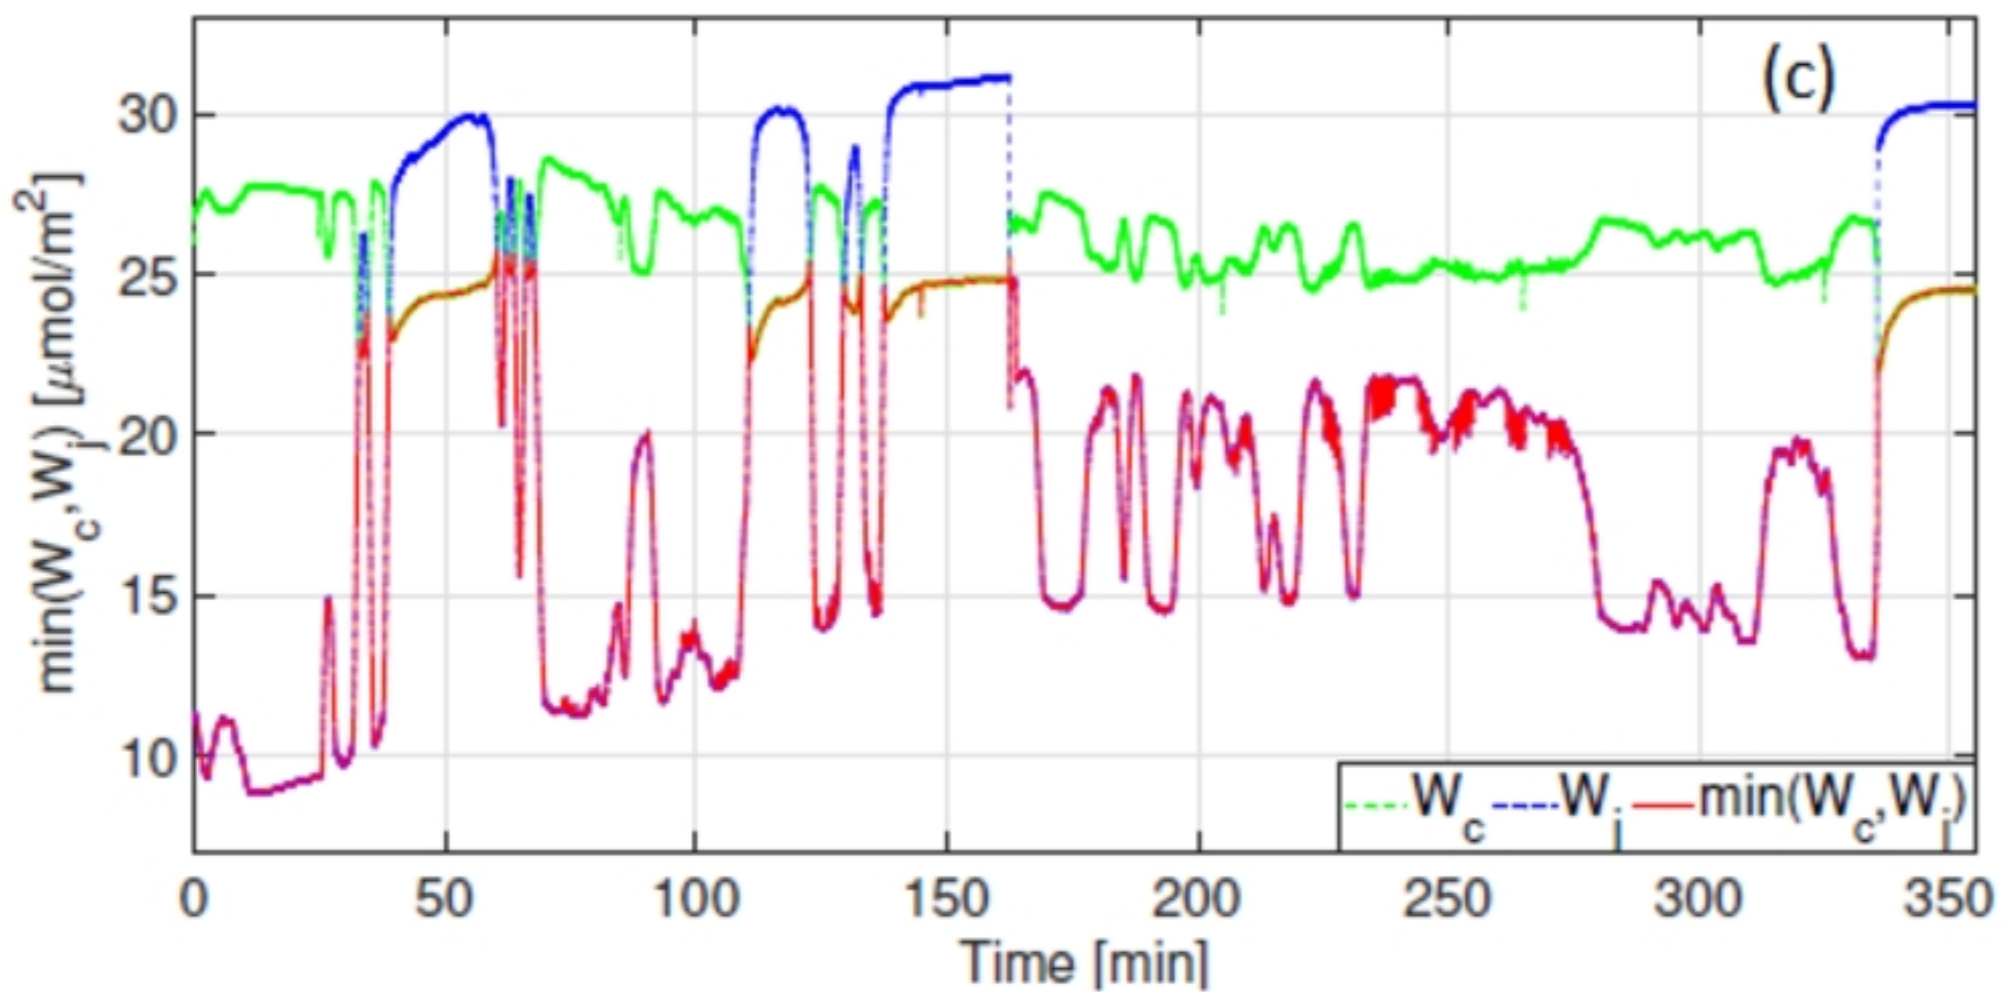

Figure 5



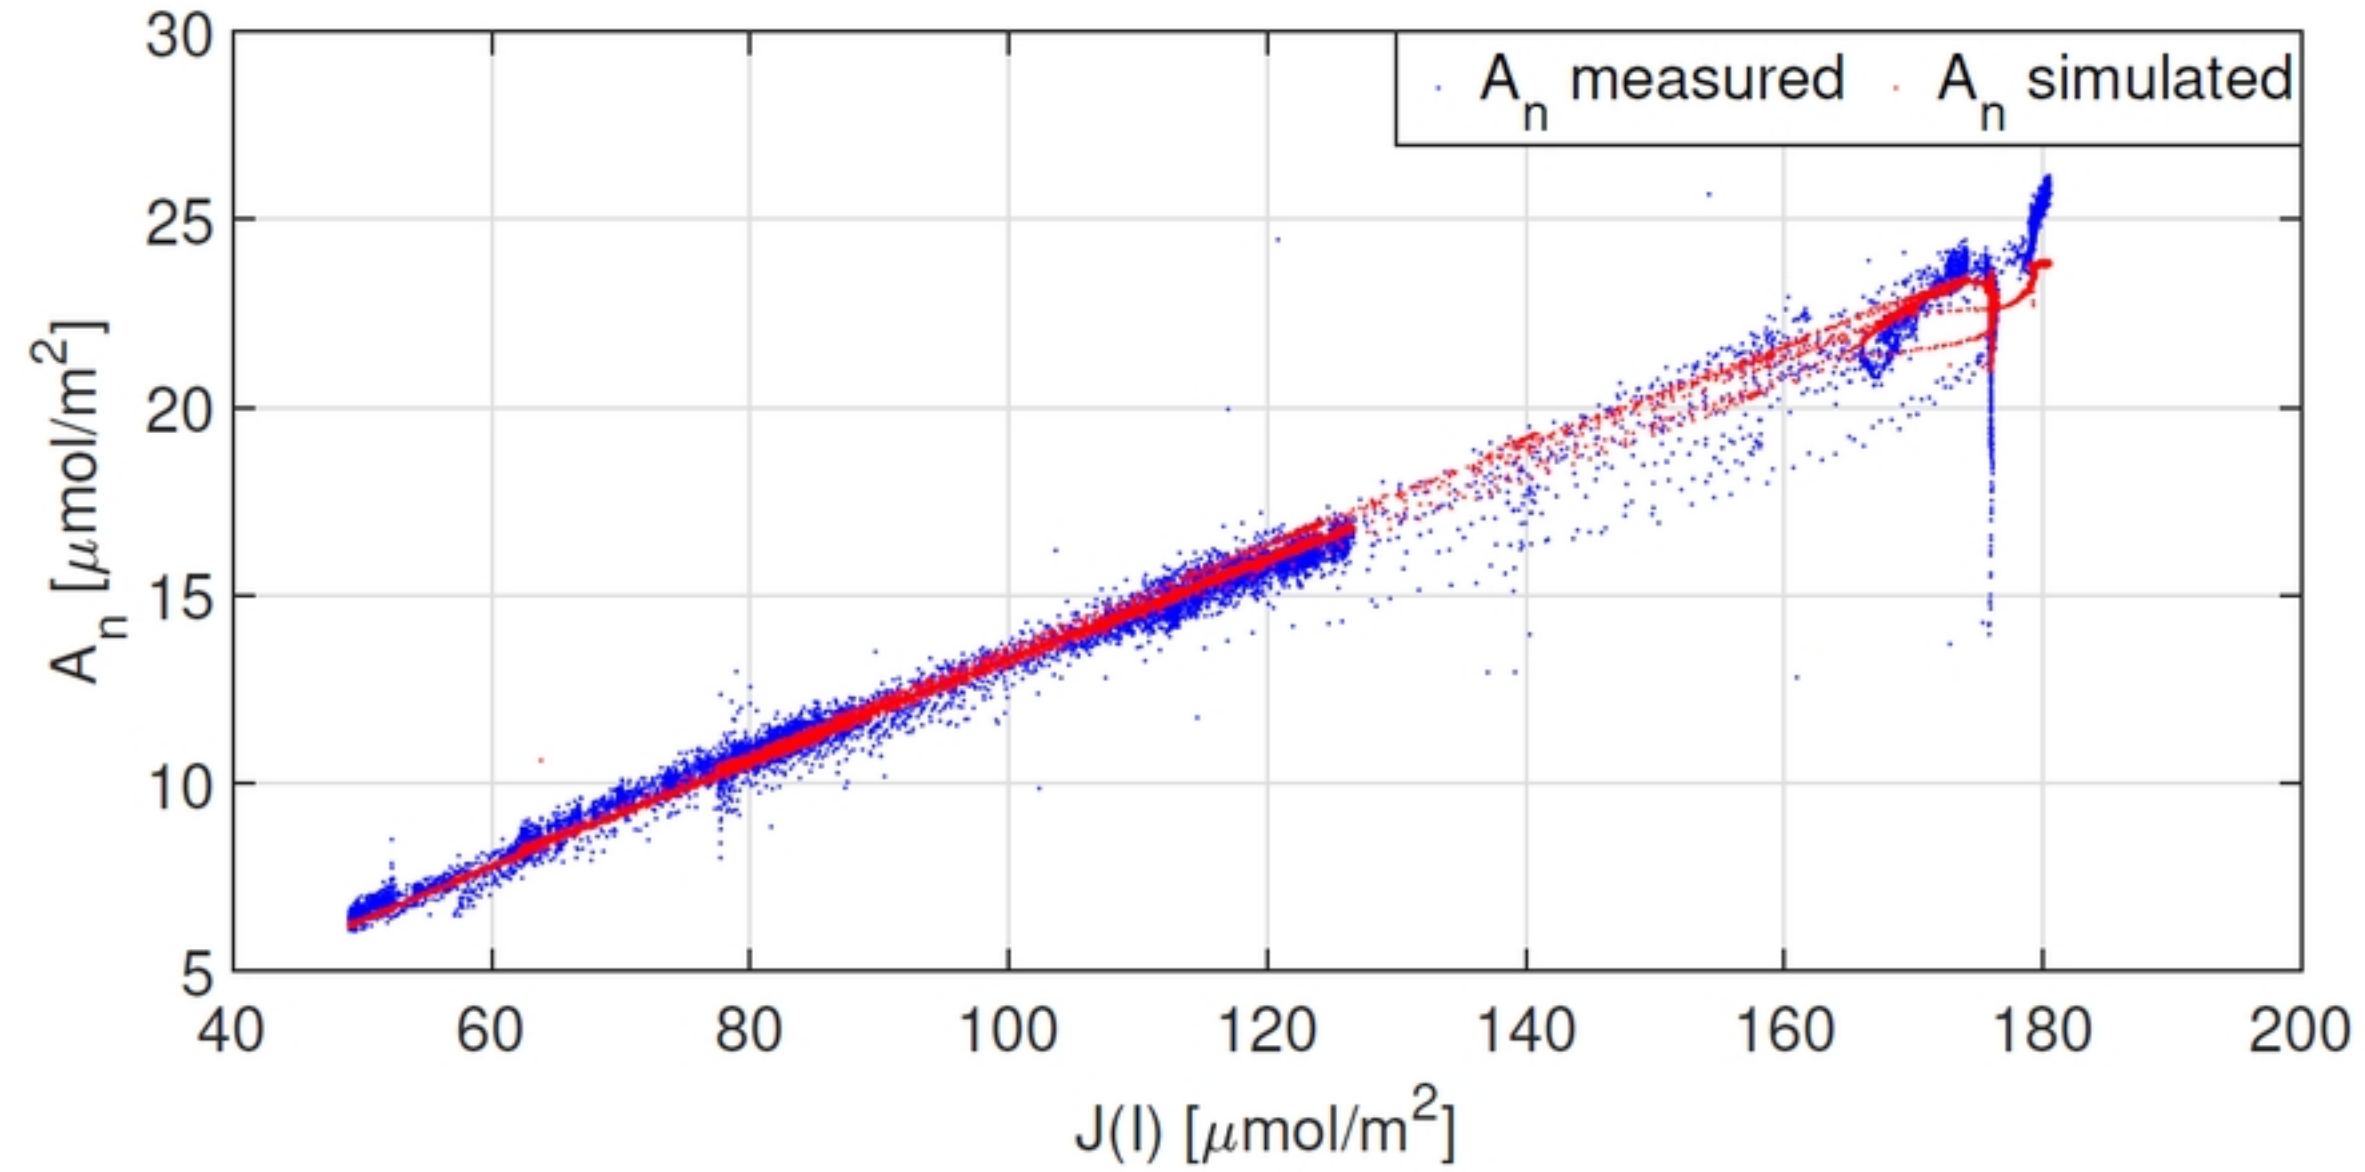

Figure 6

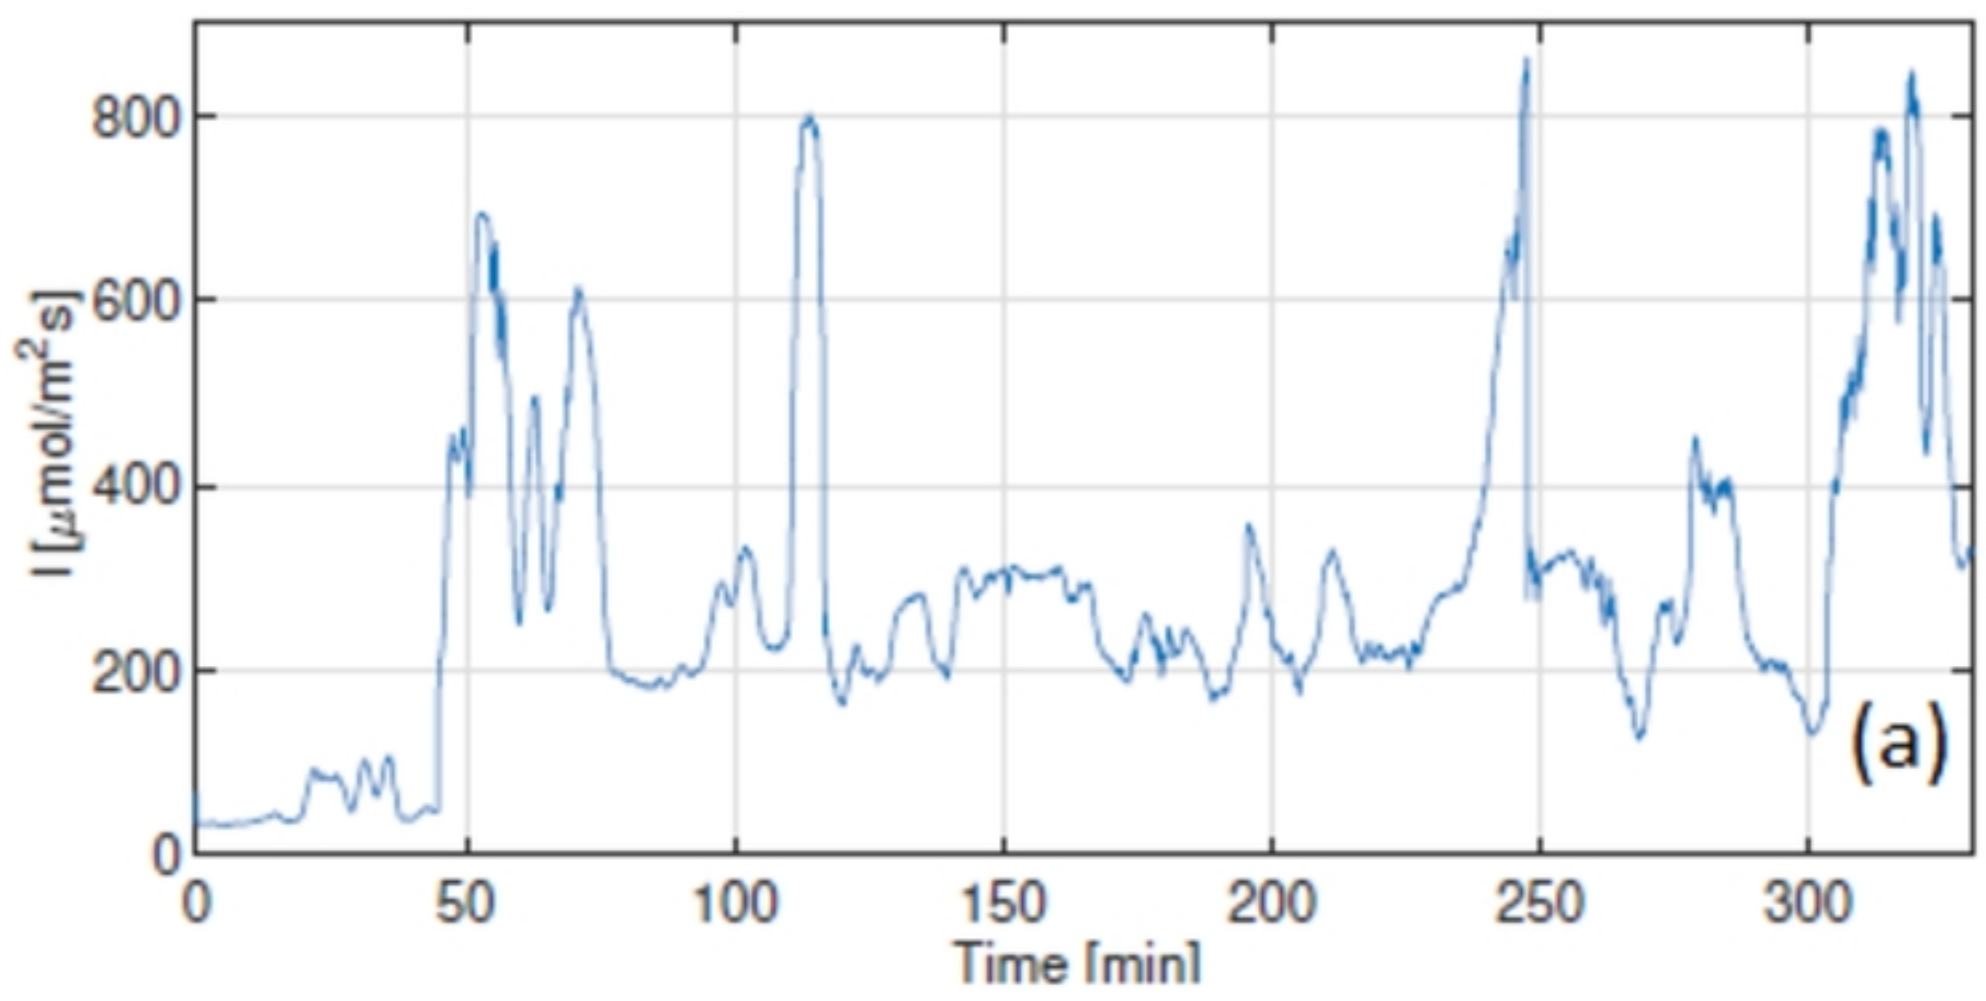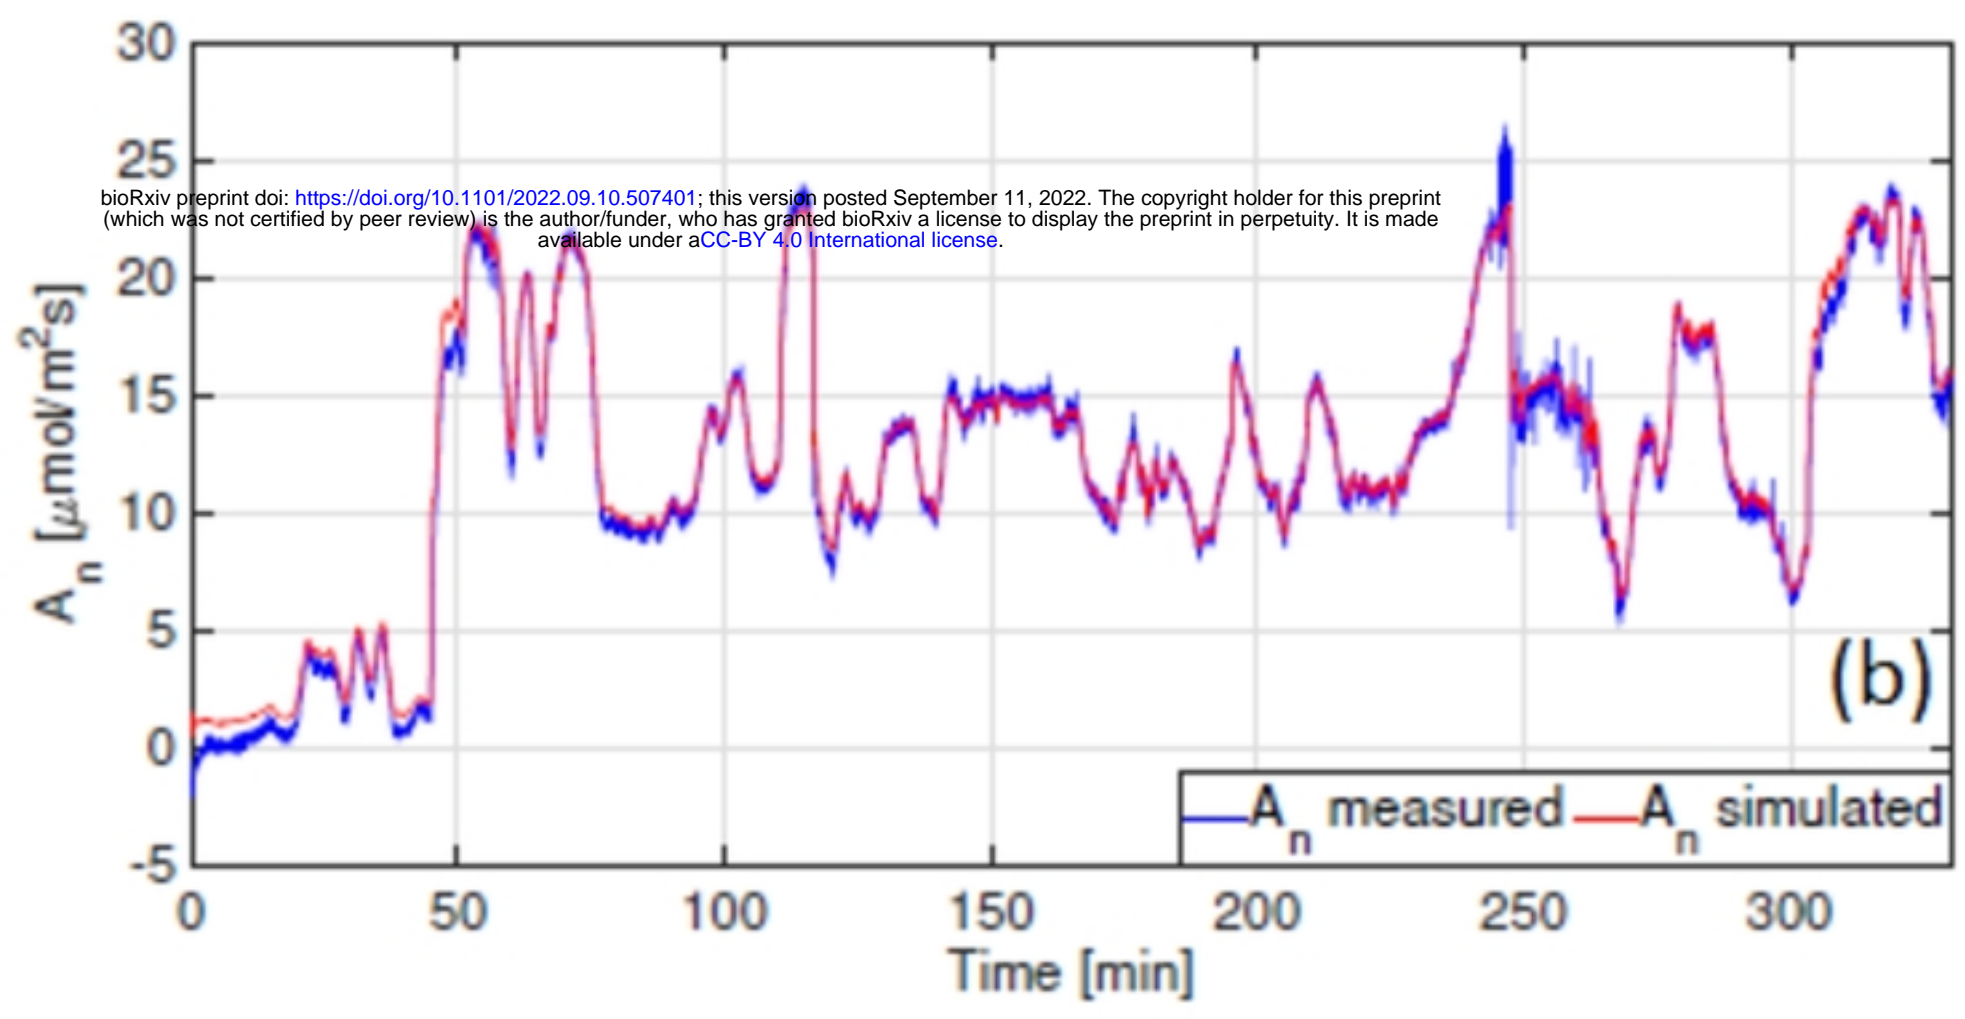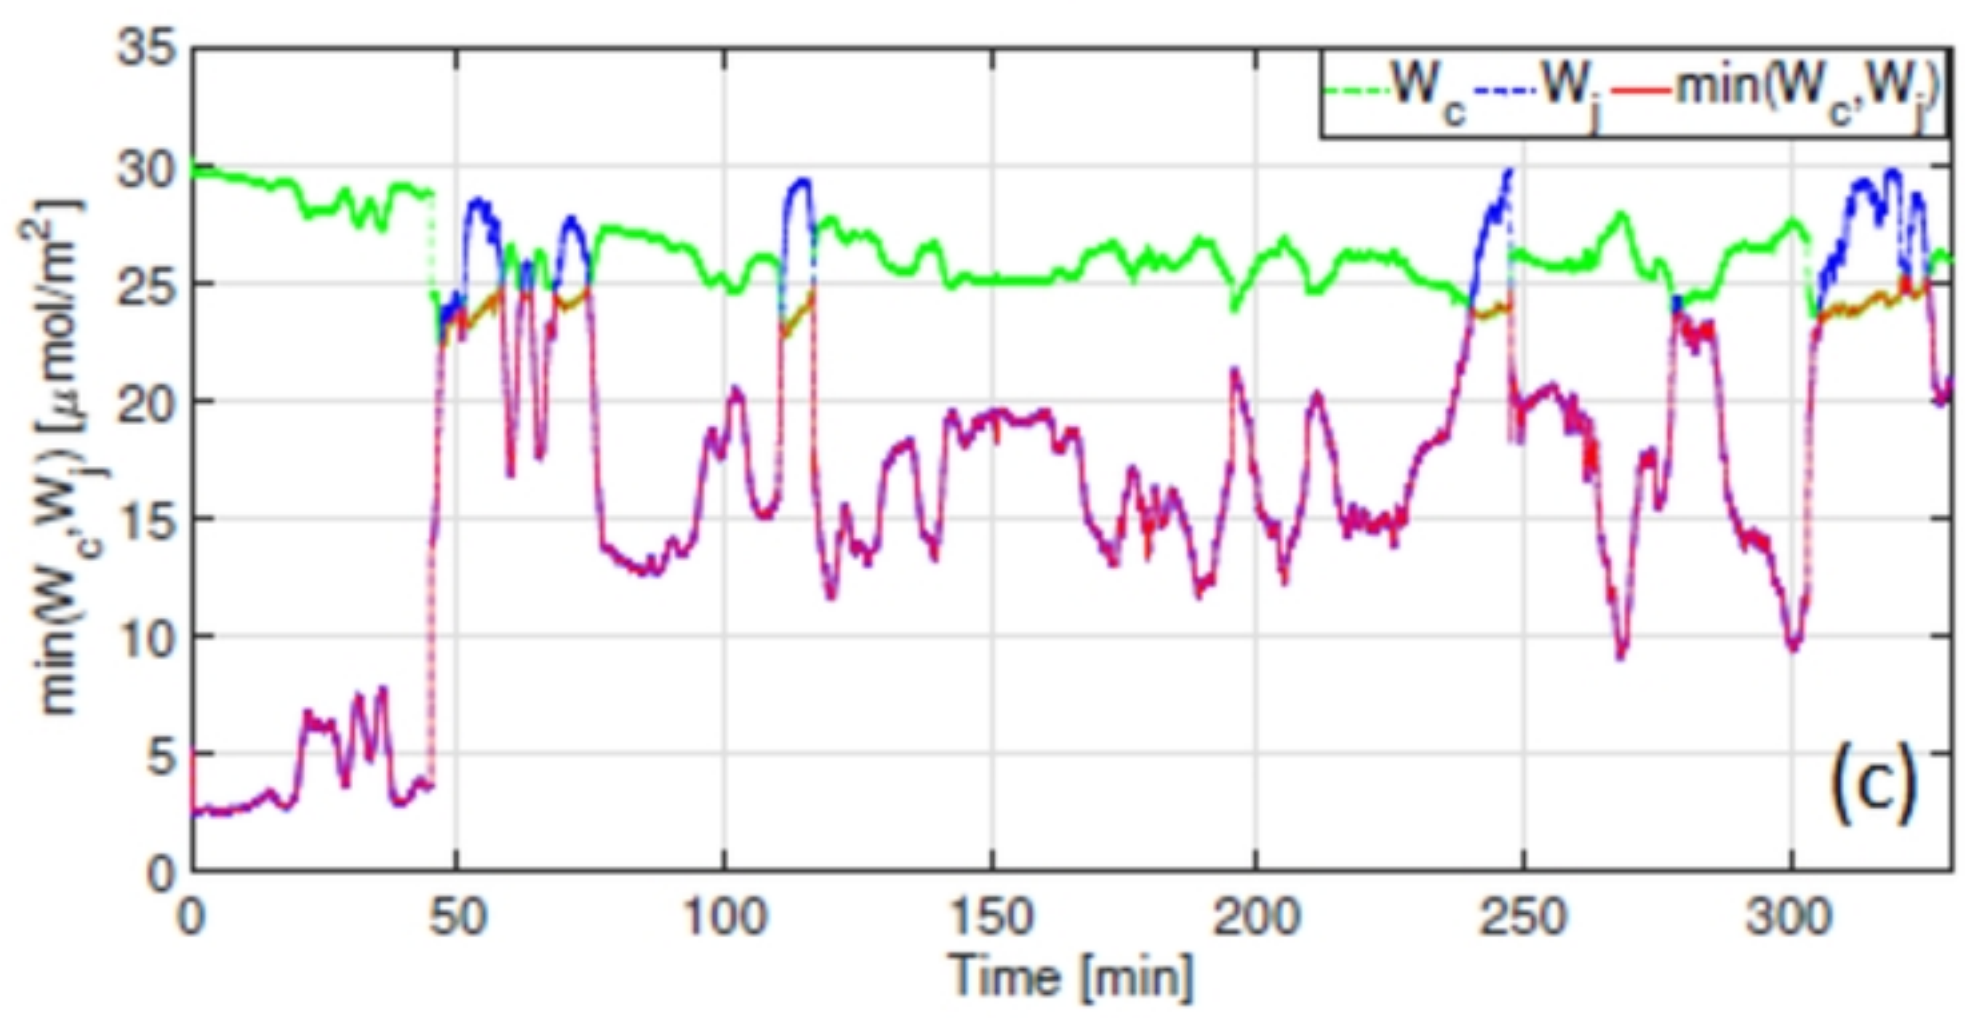

Figure 7

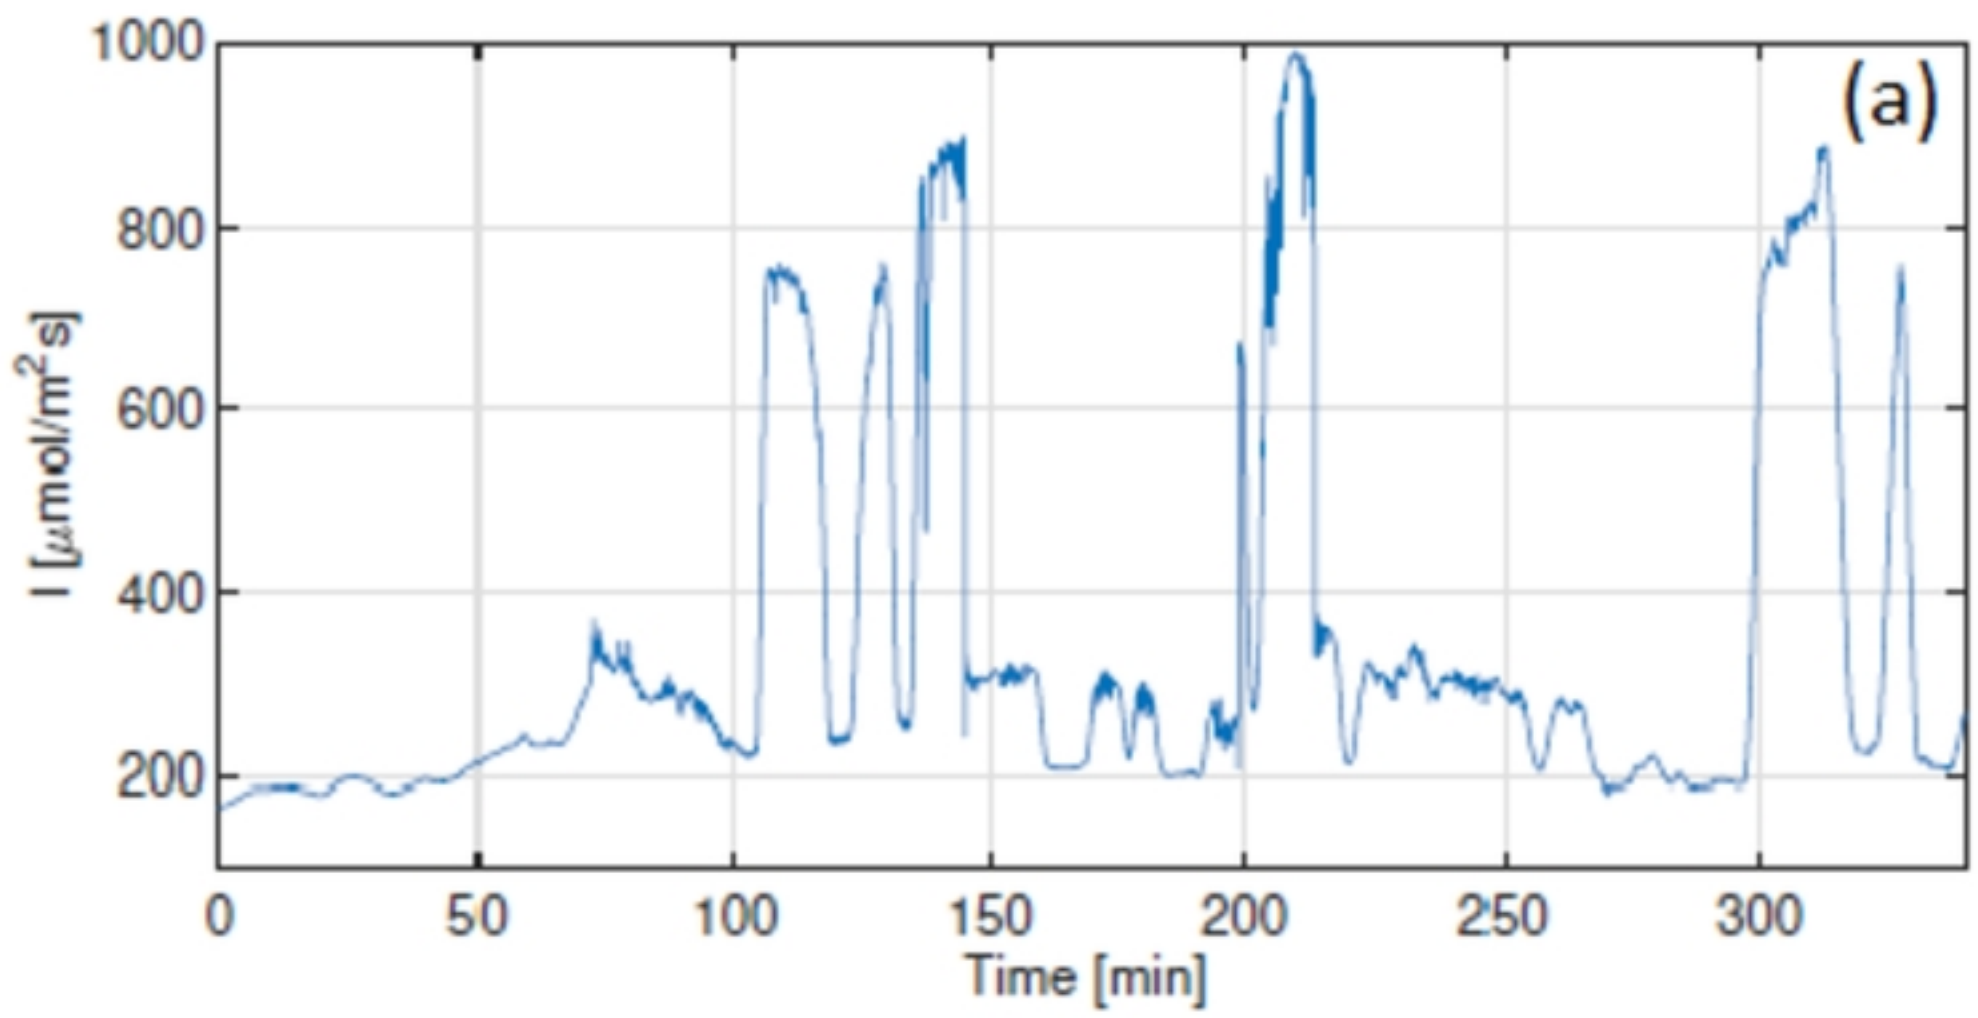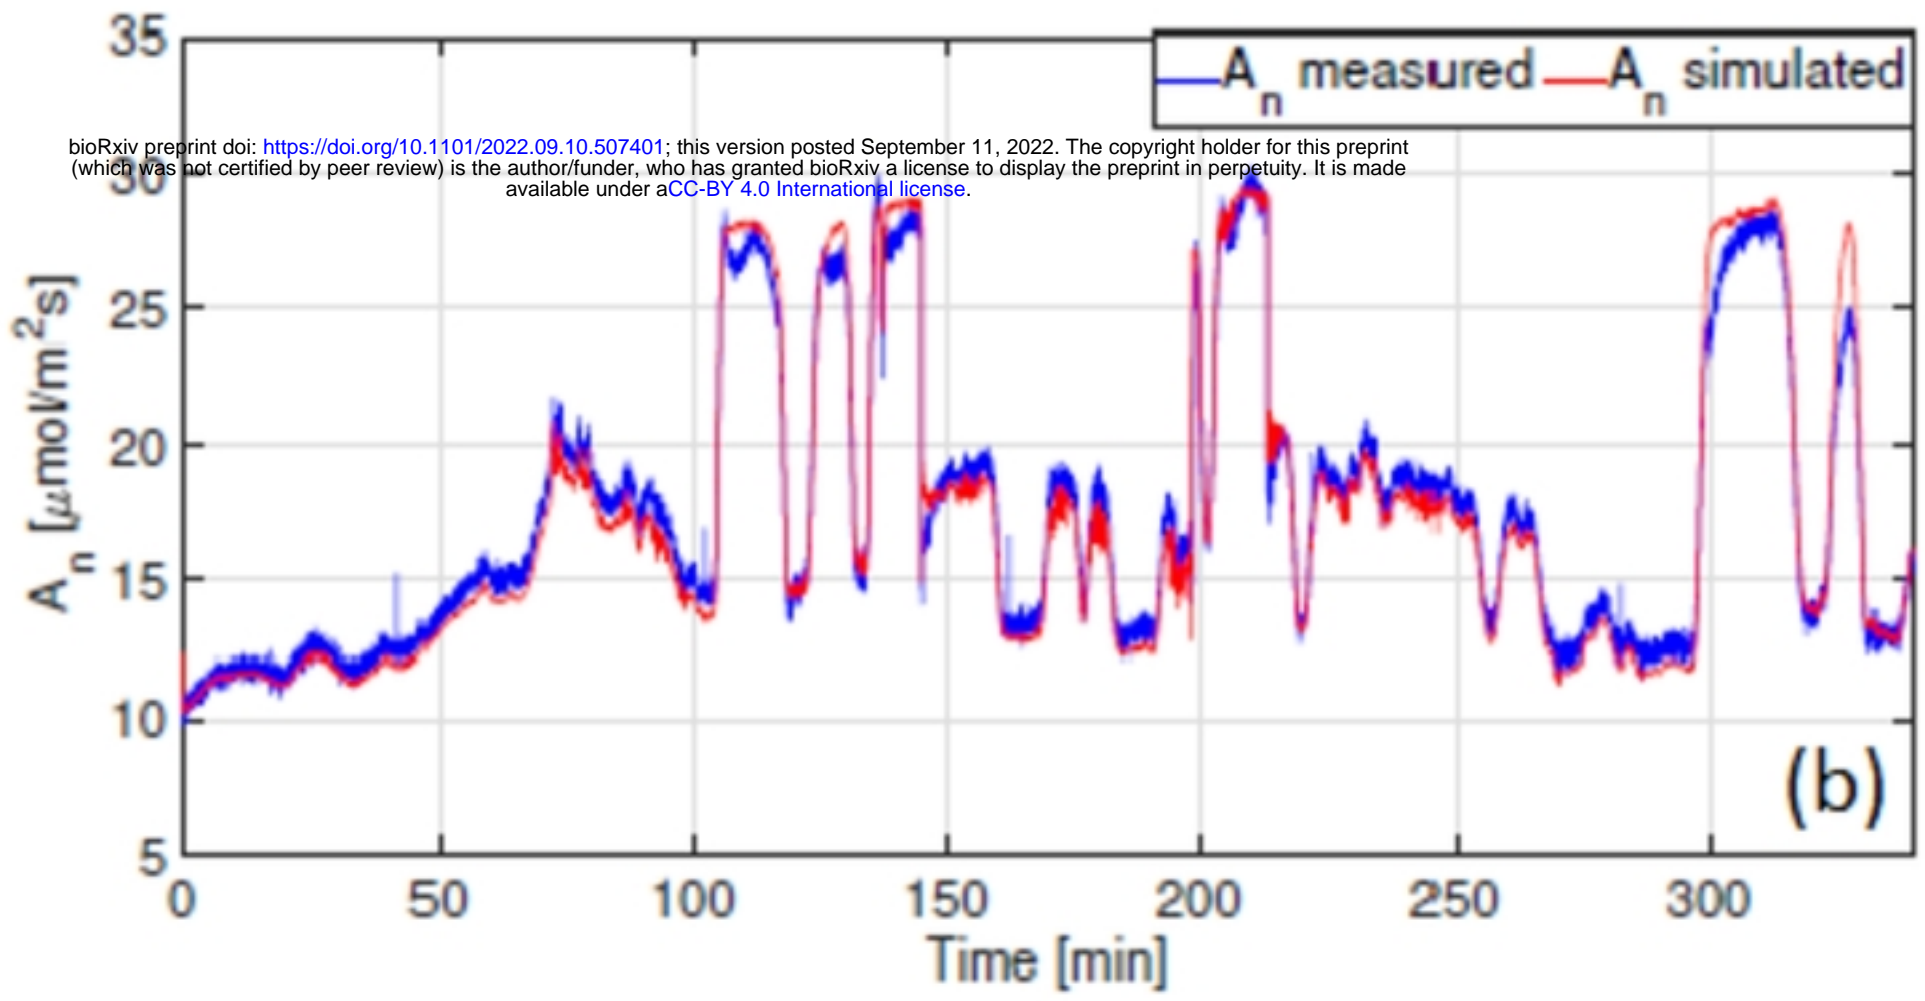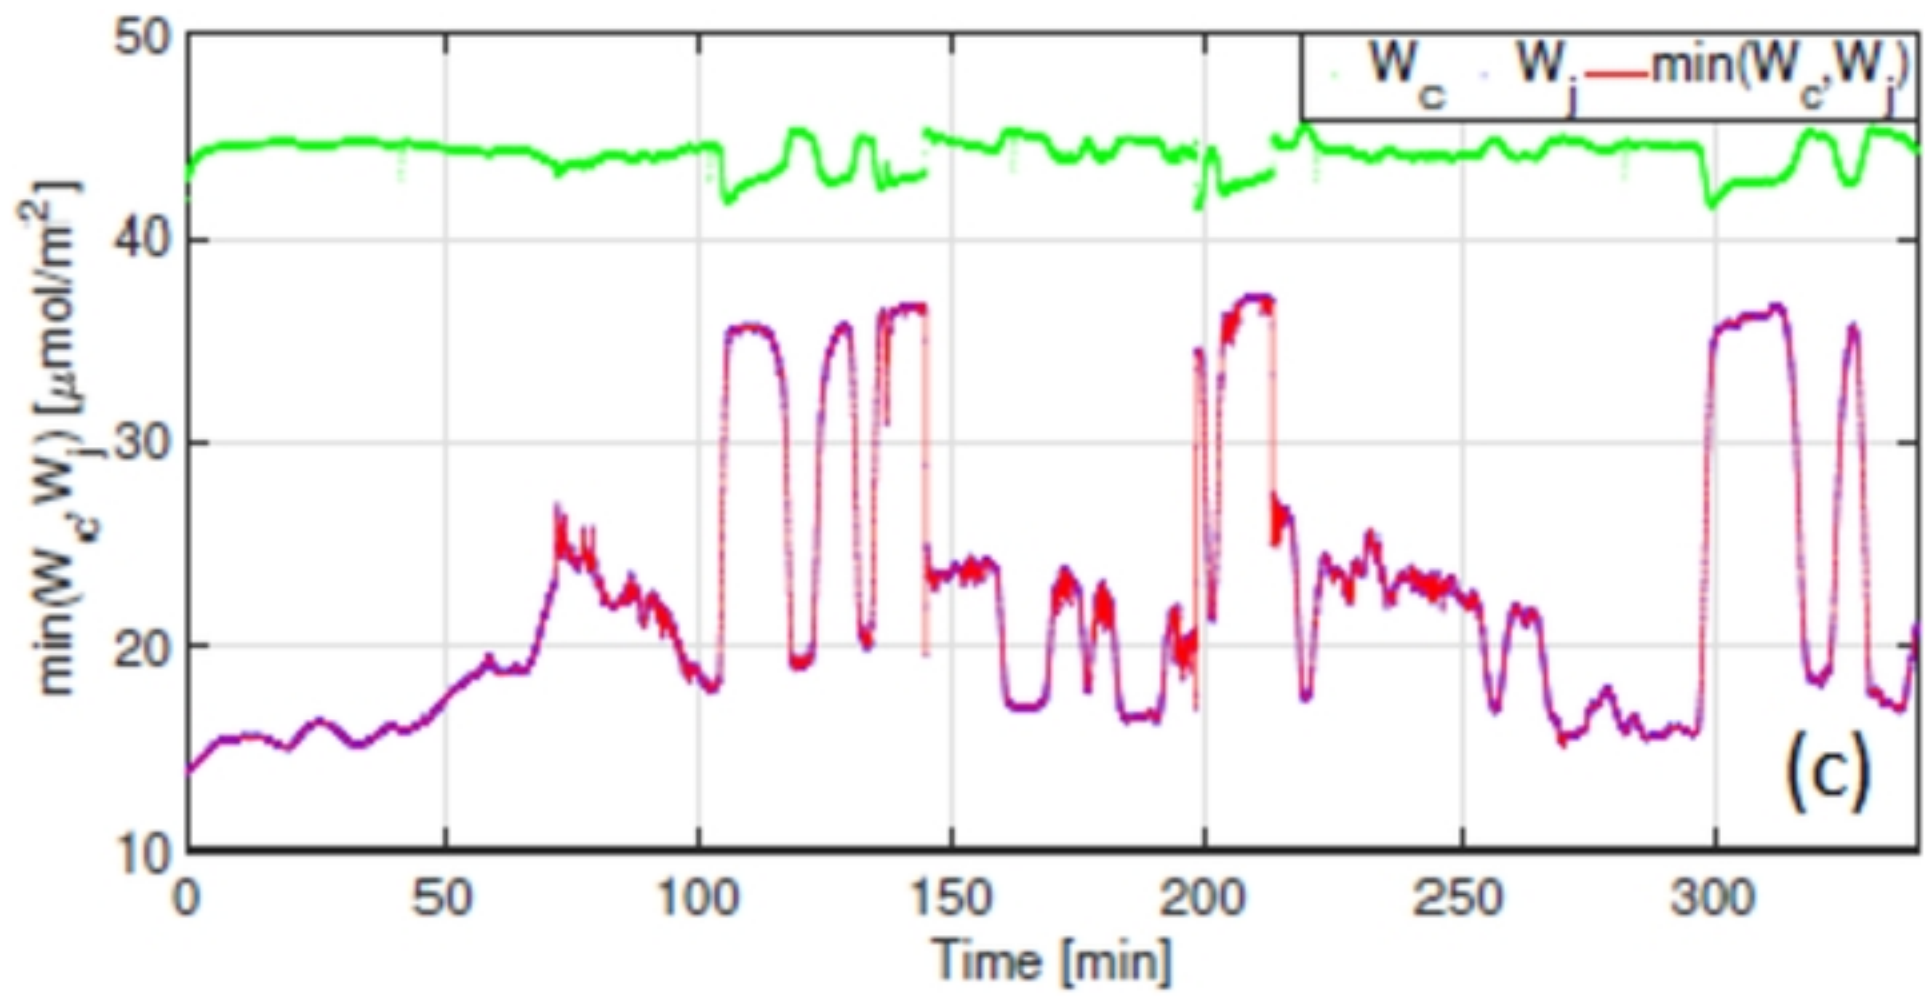

bioRxiv preprint doi: <https://doi.org/10.1101/2022.09.10.507401>; this version posted September 11, 2022. The copyright holder for this preprint (which was not certified by peer review) is the author/funder, who has granted bioRxiv a license to display the preprint in perpetuity. It is made available under aCC-BY 4.0 International license.

Figure 8

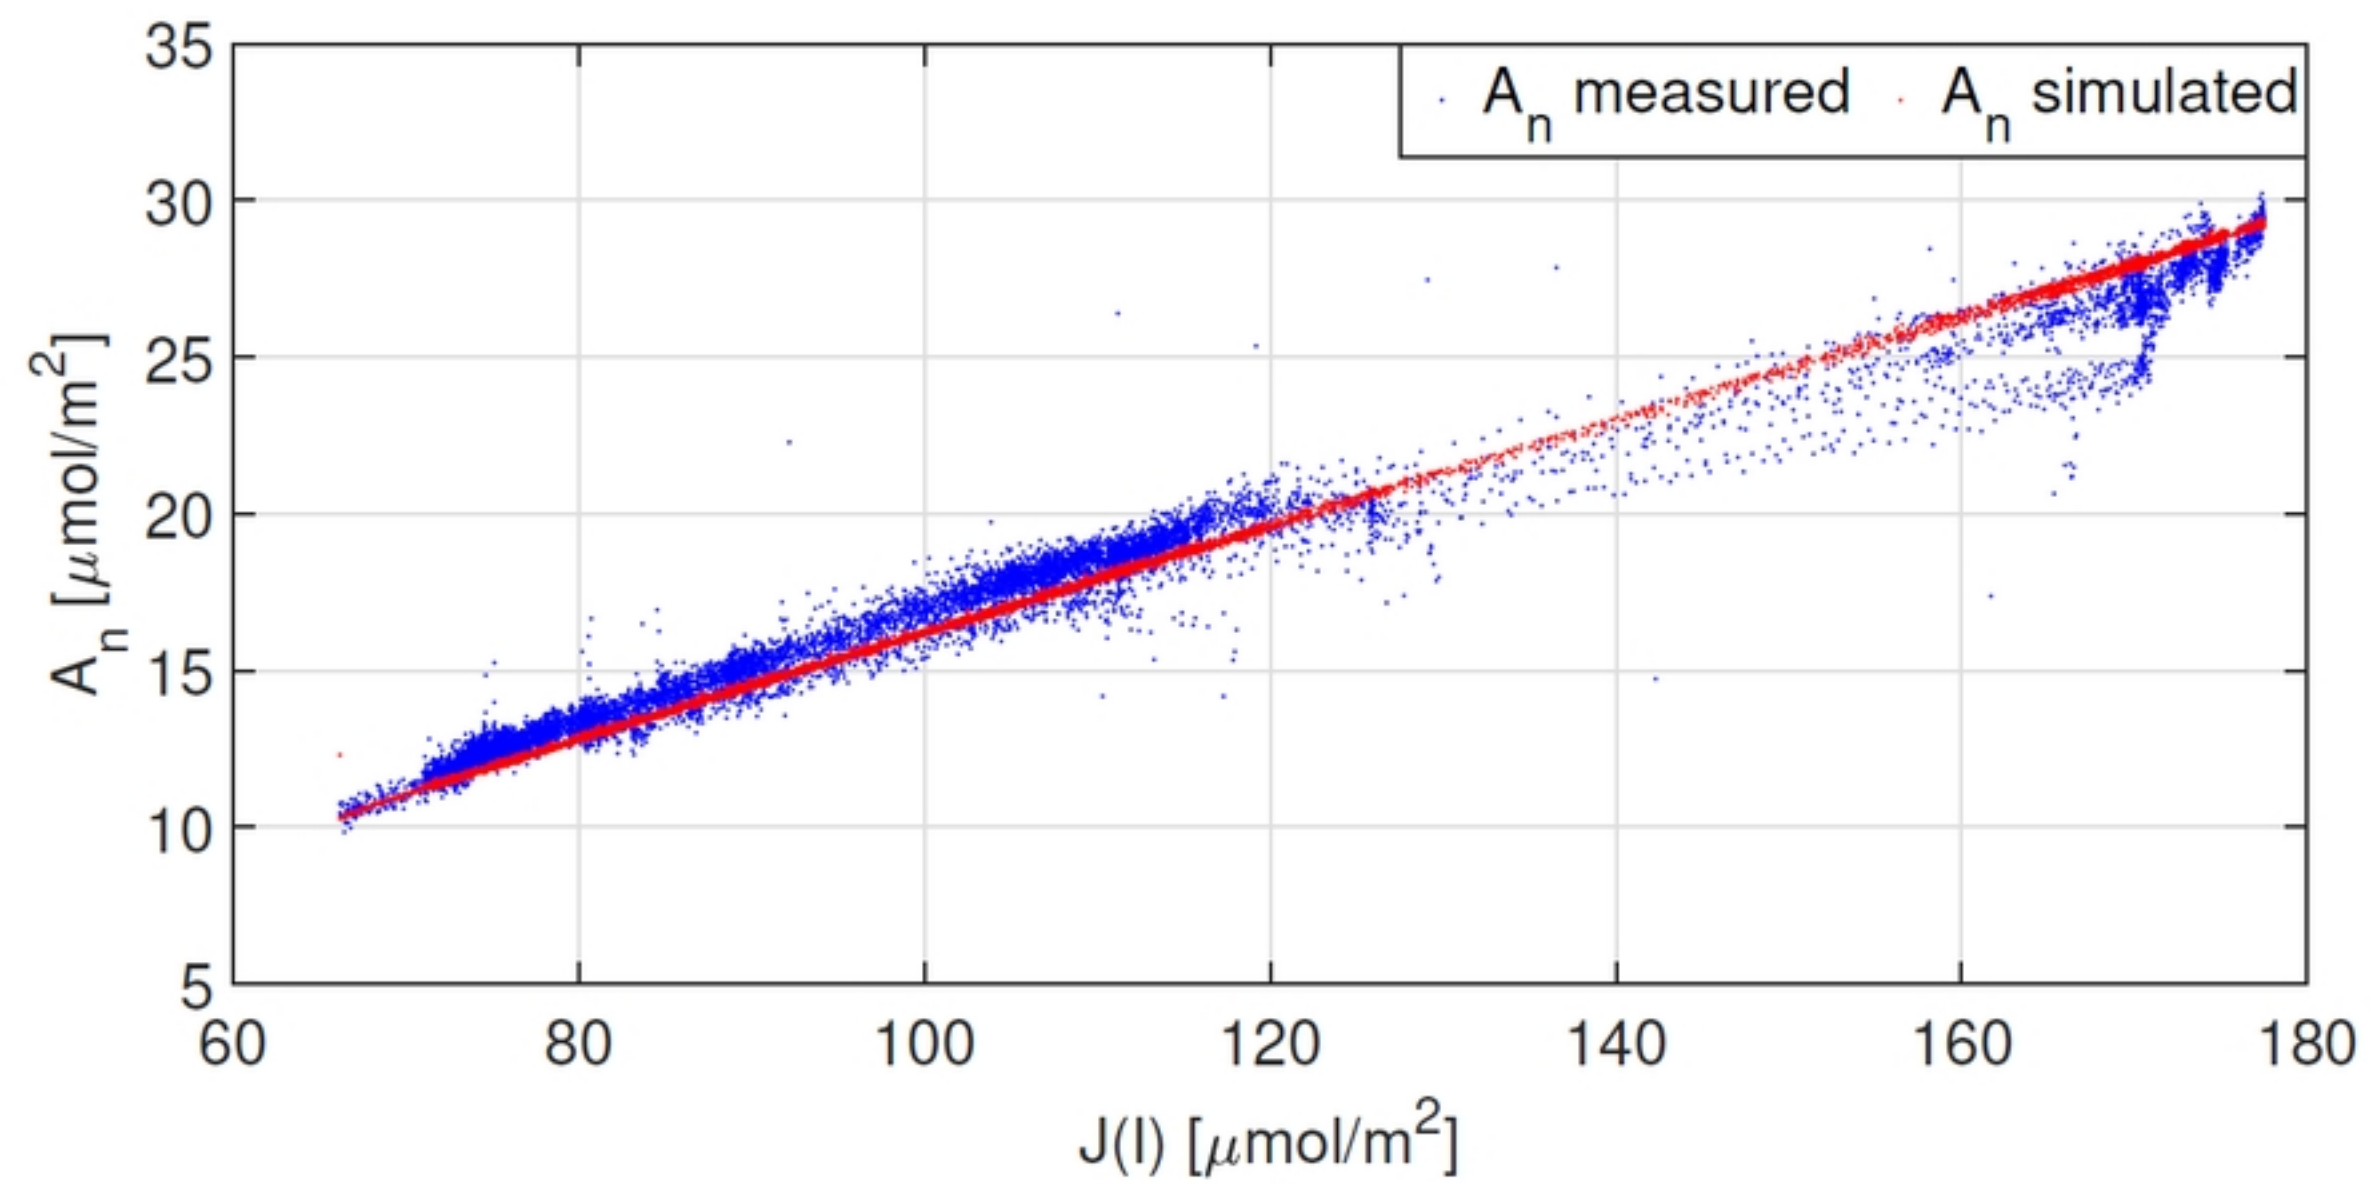

Figure 9
